# Supplementary material for: Effort and Accuracy in Choice
Source: Atypon-hosted journal article supplement (doi:10.1287/mnsc.31.4.395), 1985-04-01
Supplement: mnsc.31.4.395-sm-ec.pdf [file mnsc.31.4.395-sm-ec.pdf]

\*\*\*\*\*  
(\* VERSION 1.2  
(\* DECRULES.INT  
\*\*\*\*\*  
TIMED RISKLESS SIM \*)  
10/24/85 \*)  
\*\*\*\*\*

INTERFACE;  
UNIT DECRULES (DoRand, DoEBA, DoLexiSemi, DoLexi, DoEqualWeight, DoMCD,  
DoEBAEU, DoEBAMCD, DoAddUtility, DoTimedAU, DoSatisficing,  
DoARule);  
USES SIM;

PROCEDURE DoRand(VAR Decision: INTEGER);  
(\* Choose randomly from the alternatives in the list. \*)

PROCEDURE DoEBA(VAR Decision, EBARulCnt, EBARndCnt, EBALimit: INTEGER);

PROCEDURE DoLexiSemi(VAR Decision, LSORulCnt, LSORndCnt, LexLimit: INTEGER);

PROCEDURE DoLexi(VAR Decision, LxLimit: INTEGER);

PROCEDURE DoEqualWeight(VAR Decision, EqWLimit: INTEGER);  
(\* Based on Risky version of EquiProb. \*)

PROCEDURE DoMCD(VAR Decision, MCDTieCnt, MCDLimit: INTEGER);

PROCEDURE DoEBAEU(VAR Decision, EEULimit: INTEGER);

PROCEDURE DoEBAMCD(VAR Decision, ECDLimit: INTEGER);

PROCEDURE DoAddUtility(VAR Decision: INTEGER);

PROCEDURE DoTimedAU(VAR Decision, AdULimit: INTEGER);

PROCEDURE DoSatisficing (VAR Decision, SatRulCnt, SatRndCnt, SATLimit: INTEGER);

(\* \* \* \* \*  
(\* Run the rules.  
\* \* \* \* \*

PROCEDURE DoARule(Rule: Rules);

END;

```

(*****
(* VERSION 1.2                                TIMED RISKLESS SIM      *)
(* DECRULES.PAS                             11/22/85                *)
(*****
(* Time up processing:                                                                *)
(*   1. Doesn't apply - RAND                                                            *)
(*   2. Pick at random - EBA, Satisficing, LexiSemi, Lexi                            *)
(*   3. Current best - AddUtility, MCD, Equalweight                                  *)
(*   Current best if available, else random choice.                                  *)
(*   4. Combination - EBAMCD, EBAEU                                                    *)
(*   If rule in EBA mode, random choice.  If in MCD or EU mode                       *)
(*   when time is up, use their current best procedures.                             *)
(*****
(* 9/27 - AU rule divided into untimed original AU code and timed                    *)
(* code, now known as rule "TimedAU".  Untimed used to collect values                *)
(* used as baseline for calc of JPIndex.  Note that rule numbers are                *)
(* different in output than for riskless SIM... there's one more rule                *)
(* here: AU.  Invoke the same way however: Rules 0-9.                                *)
(*****

```

```

{$include:'fformsuo.int'}
{$include:'screenv.int'}
{$include:'sim.int'}
{$include:'lstprims.int'}
{$include:'stmprims.int'}
{$include:'random.int'}
{$include:'decrules.int'}
IMPLEMENTATION OF DECRULES;
USES sim,lstprims,stmprims,random;
USES fformsuo,screenv;
( * * * * * )
(* The timed riskless decision rules: *)
( * * * * * )

```

```

PROCEDURE DoRand;
(* Choose randomly from the alternatives. *)

VAR   TT, II: INTEGER;
      RealTemp: AttVec;

BEGIN (* DoRand *)
  TT:= IntRand(0,Cardinality(Altern) - 1); (* Choose index of choice *)

  IF AtEnd(Altern) THEN GetNext(Altern);
  FOR II:= 1 TO TT DO BEGIN      (* Loop to the choice. *)
    GetNext(Altern);
    IF AtEnd(Altern) THEN GetNext(Altern);
  END;
  Decision:= CurrValue(Altern);

END; (* DoRand *)

```

```

PROCEDURE DoEBA;

VAR Deciding: BOOLEAN;

BEGIN (* DoEBA *)

```

```

Deciding      := TRUE;
TimeUp        := FALSE;
Time[Rule]    := 0.0;  (* Reinitialize counter for this iteration. *)

WHILE ((Deciding) AND (TimeUp=FALSE)) DO

  (* Sets out-of-time condition in Timed Riskless SIM: *)
  IF Time[Rule] >= TimeLimit THEN
  BEGIN
    Deciding := FALSE;
    TimeUp    := TRUE;

END ELSE IF (Cardinality(Altern) = 1) AND (NOT AtEnd(Altern)) THEN
  BEGIN
    Deciding:= FALSE;          (* We have eliminated down to 1, *)
    Decision:= CurrValue(Altern); (* so return that. *)
    EBARulCnt:=EBARulCnt + 1;   (* Counter external to rule. *)
    (* For debug; external to rule: *)
    IF (WinsOut = TRUE) AND (q < 10) THEN (* Put winner in array *)
    BEGIN (* and output to Trace- *)
      q := q + 1; (* Out file. *)
      EBADec[q] := CurrValue(Altern);
    END;

  END ELSE IF (Cardinality(Attrib) < 1) THEN
  (* We checked all attributes and more than one alternative is left, *)
  (* so choose at random. *)
  BEGIN
    DoRand(Decision);
    Deciding:= FALSE;
    EBARndCnt:=EBARndCnt + 1; (* Counter external to rule. *)
    (* For debug; external to rule: *)
    IF (WinsOut = TRUE) AND (q < 10) THEN
    BEGIN
      q := q + 1;
      EBADec[q] := Decision;
    END;

  END ELSE IF (AtEnd(Altern) ) THEN
  (* We have eliminated all we can with this attribute. *)
  BEGIN
    Elim(Attrib);
    SetPoint(5); (* Go back to start. *)
    Forget(6); (* Marks that we need a new most *)
    (* important attribute. *)
    Forget(5);
    Forget(2); (* Marks need for new cutoff. *)

  END ELSE IF (AtEnd(Attrib) AND NOT IsEmpty(6)) THEN
  (* We have the most important attribute, so start processing: *)
  BEGIN
    SetPoint(6);
    Remember(1);
    GetCut(1,2);
    GetMin(1,2,3); (* Get min of cutoff or value. *)

  END ELSE IF NOT IsEmpty(3) AND (STM[3].Alt<>CutOffVal) THEN

```

```

(* The current attribute did not meet the cutoff; it was the min. *)
BEGIN
  Elim(Altern);
  Forget(3);

END ELSE IF NOT IsEmpty(3) AND (STM[3].Alt = CutOffVal) THEN
(* The current attribute met the cutoff; cutoff was the min. *)
BEGIN
  GetNext(Altern);
  Forget(3);

END ELSE IF (IsEmpty(2) AND IsEmpty(4) AND IsEmpty(5)) THEN
(* Initialize search for the most important attribute. *)
BEGIN
  GetWeight(5);
  GetNext(Attrib);          (* Riskless GetNext skips wgts. *)
  GetMax(5,5,6);

END ELSE IF (IsEmpty(2) AND IsEmpty(4) AND NOT IsEmpty(6) ) THEN
(* Continue search for the most important attribute. *)
BEGIN
  GetWeight(4);
  GetMax(4,6,6);          (* Current winner. *)
  Forget(4);             (* Mark that we still need one. *)
  GetNext(Attrib);       (* Riskless GetNext skips wgts. *)

END ELSE
(* Check this attribute against the cutoff. *)
BEGIN
  Remember(1);
  GetMin(1,2,3);          (* Min of cutoff and value. *)

END;   (* WHILE *)

IF (TimeUp=TRUE) THEN
BEGIN
  DoRand(Decision);
  EBALimit := EBALimit + 1;

  EBARndCnt:=EBARndCnt + 1;   (* Counter external to rule. *)
  (* For debug; external to rule: *)
  IF (WinsOut = TRUE) AND (q < 10) THEN
  BEGIN
    q := q + 1;
    EBADec[q] := Decision;
  END;
END;

END; (* DoEBA *)

```

```
PROCEDURE DoLexiSemi;
```

```
(* Lexicographic SemiOrder. On most-important att find the absolute *)
```

```

(* value of the difference between the 1st and next altern.  If the *)
(* difference is greater than a given "just-noticeable-difference" *)
(* value, elim the altern w/the smaller value.  If difference is less *)
(* than the JND, then compare the next altern value on that att vs *)
(* the greater of the 2 survivors from the previous operation. *)
(* Continue for all alterns on that att; then move to next most imp *)
(* att and repeat.  When all but one altern have been eliminated, *)
(* select that altern.  If all atts are considered and several alterns *)
(* remain, select at random.  ** ELIM modified for riskless att case; *)
(* riskless att cardinality reflects decrement of NContents by 2s. *)

```

```
VAR Deciding: BOOLEAN;
```

```
BEGIN (* DoLexiSemi *)
```

```

    Deciding := TRUE;
    TimeUp := FALSE;
    Time[Rule] := 0.0; (* Reinitialize counter for this iteration. *)

```

```
WHILE ((Deciding) AND (TimeUp=FALSE)) DO
```

```

    (* Sets out-of-time condition in Timed Riskless SIM: *)
    IF Time[Rule] >= TimeLimit THEN
    BEGIN
        Deciding := FALSE;
        TimeUp := TRUE;
    END

```

```
(* * * * * At-End Processing: * * * * * *)
```

```

(* 1 *)
ELSE IF Cardinality(Altern) = 1 THEN
    (* Only one altern left; some or all atts considered: *)
    BEGIN
        Deciding := FALSE;
        Decision := CurrValue(Altern);
        LSORulCnt := LSORulCnt + 1; (* Counter external to rule... *)
        (* For debug; also external to rule: *)
        IF (WinsOut=TRUE) AND (p < 10) THEN
        BEGIN
            p := p + 1;
            LexDec[p] := CurrValue(Altern);
        END;
    END

```

```

(* 2 *)
ELSE IF (Cardinality(Attrib)=0) THEN
    (* Cardinality(Altern) > 1 implied *)
    (* Finished with all atts/columns, but there are still several *)
    (* valid alterns/rows. *)
    BEGIN
        Deciding := FALSE;
        DoRand(Decision);
        LSORndCnt := LSORndCnt + 1; (* Counter external to rule... *)
        (* For debug; also external to rule: *)
        IF (WinsOut=TRUE) AND (p < 10) THEN
        BEGIN
            p := p + 1;
            LexDec[p] := Decision;
        END;
    END

```



```

ELSE IF (Cardinality(Attrib) > 2) AND (NOT AtEnd(Attrib))
      AND (NOT IsEmpty(1)) AND (IsEmpty(2)) AND (IsEmpty(5)) THEN
(* Continue search for most-impd attrib, by testing challengers. *)
(* If only 1 attribute is left in the list; no need to search. *)
BEGIN
  GetWeight(2);          (* Challenger. *)
  GetMax(2,3,3);
  Forget(2);            (* Mark that more attributes can *)
                          (* challenge, if available. *)
  GetNext(Attrib);
END

(* * * * Begin Processing: ie,-Comparing Alt Values in This Att * * *)

(* 6A *)
ELSE IF (Cardinality(Attrib) > 2) AND (AtEnd(Attrib))
      AND (IsEmpty(2)) THEN
(* All atts have challenged, and we have the most impd, so begin. *)
(* Positions most impd att when several have been considered. Not *)
(* for special case of only 1 att left; see paragraph 6B. *)
BEGIN
  GetJND(4);            (* Just Noticeable Difference. *)
  SetPoint(3);         (* 1st avail altern and most-impd *)
                          (* att to current pointers. *)
  Forget(3);
  Remember(1);         (* Get 2 altern in same att for *)
  GetNext(Altern);     (* comparison in STM Loc 1 and 2. *)
  Remember(2);
END

(* 6B *)
ELSE IF (Cardinality(Attrib) = 2) AND (IsEmpty(2)) THEN
(* Special case of only 1 att left; commence processing. *)
BEGIN
  GetJND(4);
  Remember(1);
  GetNext(Altern);
  Remember(2);
END

(* 7 *)
ELSE IF (NOT IsEmpty(2)) AND (IsEmpty(5)) THEN
(* Initial compare with results into STM Loc 3. Subsequent looping *)
(* compares occur in paragraph 10. Impd to identify the minimum *)
(* value (loser) so it can be eliminated in paragraph 8 if needed. *)
BEGIN
  Subt(1,2,3);
  GetMax(1,2,5);
  GetMin(1,2,6);
END

(* 8AA *)
ELSE IF (Cardinality(Altern) > 2) AND (NOT IsEmpty(3))
      AND (IsEmpty(7))
      AND (ABS(STM[3].AValue) > STM[4].AValue) THEN
(* Failed; difference of 2 values was > JND. *)
BEGIN
  SetPoint(2);         (* Find last challenger, then *)
  GetNext(Altern);     (* set up to get next, if any. *)
  Remember(7);         (* Mark that setup has occurred. *)

```

END

(\* 8AB \*)

```
ELSE IF (Cardinality(Altern) > 2) AND (NOT IsEmpty(3))
      AND (ABS(STM[3].AValue) > STM[4].AValue)
      AND (NOT AtEnd(Altern)) THEN
  BEGIN
    Forget(3);
    Remember(2);      (* Since NOT at end, get this value in STM. *)
    SetPoint(6);
    Elim(Altern);    (* Get rid of loser. *)
    Forget(7);      (* Clear out marker. *)
  END
```

(\* 8AC \*)

```
ELSE IF (Cardinality(Altern) > 2) AND (NOT IsEmpty(3))
      AND (ABS(STM[3].AValue) > STM[4].AValue)
      AND (AtEnd(Altern)) AND (NOT IsEmpty(7)) THEN
  BEGIN
    SetPoint(6);
    Elim(Altern);
    Forget(7);
    SetPoint(6);    (* Reverse the setpoint operation. *)
  END
```

(\* 8B \*)

```
ELSE IF (Cardinality(Altern) = 2) AND (NOT IsEmpty(3))
      AND (ABS(STM[3].AValue) > STM[4].AValue)
      AND (NOT AtEnd(Altern)) THEN
  (* Failed as above, but a special case where elim the loser leaves *)
  (* only 1 alt left: the choice. So don't set up for next compare. *)
  (* Next production to fire will be the decision selector. *)
  (* NB- 3B and 3C take care AtEnd(Altern) cases; they either end *)
  (* & pick at random, or go on to another attribute's alterns. *)
  BEGIN
    SetPoint(6);
    Elim(Altern);
    SetPoint(5);    (* Position to winning alt. *)
  END
```

(\* 9A \*)

```
ELSE IF (NOT IsEmpty(3))
      AND (ABS(STM[3].AValue) < STM[4].AValue)
      AND (IsEmpty(7)) THEN
  (* Passed; difference of 2 values was < JND. Don't eliminate *)
  (* either alternative. *)
  BEGIN
    SetPoint(2);    (* Return to place in list. *)
    GetNext(Altern); (* Another challenger? *)
    Remember(7);    (* Mark that we've done this 1/2. *)
  END
```

(\* 9B \*)

```
ELSE IF (NOT IsEmpty(3))
      AND (ABS(STM[3].AValue) < STM[4].AValue)
      AND (NOT AtEnd(Altern)) AND (Not IsEmpty(7)) THEN
  BEGIN
    Forget(3);
    Remember(2);    (* Since not at end, get value set up in *)
    Forget(7);    (* previous paragraph. Clear marker in 7. *)
  END
```

```

END

(* 10 *)
ELSE IF (NOT AtEnd(Altern)) AND (NOT IsEmpty(1)) THEN
  (* Continue processing begun in earlier paragraphs (8, 9)... *)
  BEGIN
    Subt(2,5,3);          (* Get difference bet. the two. *)
    GetMin(2,5,6);       (* Get loser in case elim needed. *)
    GetMax(2,5,5);       (* Statement order imp't here. *)

  END;  (* WHILE *)

IF (TimeUp=TRUE) THEN
  BEGIN
    DoRand(Decision);
    LexLimit := LexLimit +1;

    LSORndCnt := LSORndCnt + 1;  (* Counter external to rule... *)
    (* For debug; also external to rule: *)
    IF (WinsOut=TRUE) AND (p < 10) THEN
      BEGIN
        p := p + 1;
        LexDec[p] := Decision;
      END;
    END;

  END;

END;  (* LexiSemi *)

```

```

PROCEDURE DoLexi;

```

```

(* Lexicographic Rule.  On most-important att compare the values of *)
(* two alternatives and elim the altern w/the lesser value.  Use the *)
(* altern with the larger, winning value as the basis for comparison *)
(* with the next altern on that att.  Continue for all alterns on *)
(* that att.  When all but one altern have been eliminated, return *)
(* the remaining altern as the winner.  **ELIM modified for riskless *)
(* att case; riskless att cardinality reflects decrement of NContents *)
(* by 2s instead of by 1s.  This means that to indicate more than 1 *)
(* att, for example, code reads: "cardinality(attrib)>2". *)

```

```

VAR Deciding: BOOLEAN;

```

```

BEGIN  (* DoLexi *)

```

```

  Deciding      := TRUE;
  TimeUp        := FALSE;
  Time[Rule]    := 0.0; (* Reinitialize counter for this iteration. *)

```

```

WHILE ((Deciding) AND (TimeUp=FALSE)) DO

```

```

  (* Sets out-of-time condition in Timed Riskless SIM: *)
  IF Time[Rule] >= TimeLimit THEN

```

```

BEGIN
    Deciding := FALSE;
    TimeUp   := TRUE;

(* * * * * * * * * * At-End Processing: * * * * * * * * * * * * * * *)

(* 1 *)
END ELSE IF Cardinality(Altern) = 1 THEN
(* Only one altern left; all alterns on this att have been checked:*)
BEGIN
    Deciding := FALSE;
    Decision := CurrValue(Altern);
    (* For debug; also external to rule: *)
    IF (WinsOut=TRUE) AND (s < 10) THEN
    BEGIN
        s := s + 1;
        LxDec[s] := CurrValue(Altern);
    END;
END

(* * * * * * * * * * Get Most-Likely Attribute * * * * * * * * * * * * *)

(* 2 *)
ELSE IF (IsEmpty(1)) THEN
(* No compare yet in progress; initial search for most-important *)
(* attribute. *)
BEGIN
    GetWeight(1);          (* Weight of this attribute. *)
    GetMax(1,3,3);        (* Greatest weight stored in STM Loc 3. *)
    GetNext(Attrib);
END

(* 3 *)
ELSE IF (NOT AtEnd(Attrib)) AND (NOT IsEmpty(1)) AND
        (IsEmpty(2)) AND (IsEmpty(5)) THEN
(* Continue search for most-impt attrib, by testing challengers. *)
(* If only 1 attribute is left in the list; no need to search. *)
BEGIN
    GetWeight(2);          (* Challenger. *)
    GetMax(2,3,3);
    Forget(2);             (* Mark that more attributes can *)
                           (* challenge, if available. *)
    GetNext(Attrib);
END

(* * * * Begin Processing: ie,-Comparing Alt Values in This Att * * *)

(* 4 *)
ELSE IF (AtEnd(Attrib)) AND (IsEmpty(2)) THEN
(* All atts have challenged, and we have the most impt, so begin. *)
(* Positions most impt att when several have been considered. *)
BEGIN
    SetPoint(3);          (* 1st avail altern and most-impt*)
                           (* att set to current pointers. *)
    Forget(3);
    Remember(1);          (* Get 2 altern in same att for *)
    GetNext(Altern);      (* comparison in STM Loc 1 and 2.*)
    Remember(2);
END

```

```

(* 5 *)
ELSE IF (Cardinality(Altern) > 2) AND (NOT IsEmpty(2)) AND
      (IsEmpty(5)) THEN
(* Case of more than 2 alternatives still left to consider. *)
(* Elim the altern w/smaller value and set up for next compare, *)
(* since after elim there are still at least 2 altern. STM5=best. *)
BEGIN
  GetMax(1,2,5);
  GetMin(1,2,6);
  SetPoint(5); (* Put winner in STM Loc 1. *)
  Remember(1);
  SetPoint(2); (* Return to last challenger, & *)
  GetNext(Altern); (* then get the next challenger. *)
  Remember(2); (* New challenger in STM Loc 2. *)
  SetPoint(6); (* Get rid of losing altern. *)
  Elim(Altern);
  Forget(5); (* Mark we're ready for the *)
              (* next comparison. *)
END

```

```

(* 6 *)
ELSE IF (Cardinality(Altern) = 2) AND (NOT IsEmpty(2)) AND
      (IsEmpty(5)) THEN
(* Case of only 2 alternatives to consider. When 1 eliminated, *)
(* don't go through the steps to set up another comparison. *)
(* Next production to fire will be the decision selector. *)
BEGIN
  GetMax(1,2,5);
  GetMin(1,2,6);
  SetPoint(6); (* Delete losing alternative. *)
  Elim(Altern);
  SetPoint(5); (* Position to winning alt. *)
END; (* WHILE *)

```

```

IF (TimeUp=TRUE) THEN
BEGIN
  DoRand(Decision);
  LxLimit := LxLimit +1;
  (* For debug; also external to rule: *)
  IF (WinsOut=TRUE) AND (s < 10) THEN
  BEGIN
    s := s + 1;
    LxDec[s] := CurrValue(Altern);
  END;

```

```

END;

```

```

END; (* DoLexi *)

```

```

PROCEDURE DoEqualWeight;

```

```

VAR Deciding: BOOLEAN;

```

```

BEGIN (* DoEqualWeight *)

```

```

Deciding      := TRUE;
TimeUp        := FALSE;
Time[Rule]    := 0.0; (* Reinit counter for this iteration. *)

```

```

WHILE ((Deciding) AND (TimeUp=FALSE)) DO

```

```

(* Sets out-of-time condition in Timed Riskless SIM: *)

```

```

IF Time[Rule] >= TimeLimit THEN

```

```

BEGIN

```

```

    Deciding := FALSE;

```

```

    TimeUp   := TRUE;

```

```

END ELSE IF AtEnd(Altern) THEN

```

```

BEGIN

```

```

    Deciding := FALSE;          (* Exhausted all alternatives. *)

```

```

    Decision := STM[5].Alt;

```

```

    (* For debug; external to rule: *)

```

```

    IF (WinsOut=TRUE) AND (n < 10) THEN

```

```

        BEGIN

```

```

            n := n + 1;

```

```

            EqWDec[n] := STM[5].Alt;

```

```

        END;

```

```

    END

```

```

ELSE IF AtEnd(Attrib) THEN

```

```

BEGIN

```

```

    (* End of this alt's atts. *)

```

```

    GetMax(2,5,5);

```

```

    Forget(2);          (* Initialize for new calculation *)

```

```

    GetNext(Altern);   (* and move on. *)

```

```

    GetNext(Attrib);

```

```

END

```

```

ELSE IF IsEmpty(2) THEN

```

```

BEGIN

```

```

    (* For 1st att in an altern; avoids*)

```

```

    Remember(2);      (* an unnecessary addition. *)

```

```

    GetNext(Attrib);

```

```

END

```

```

ELSE BEGIN

```

```

    (* Get next payoff and sum. *)

```

```

    Remember(1);      (* The att value. *)

```

```

    GetNext(Attrib);

```

```

    Add(1,2,2);

```

```

END; (* WHILE *)

```

```

IF (TimeUp=TRUE) THEN

```

```

BEGIN

```

```

    IF STM[5].Alt > 0 THEN          (* If a current best is avail *)

```

```

        Decision := STM[5].ALT      (* take it. *)

```

```

    ELSE

```

```

        DoRand(Decision);

```

```

        EqWLimit := EqWLimit + 1;

```

```

    (* For debug; external to rule: *)

```

```

    IF (WinsOut=TRUE) AND (n < 10) THEN

```

```

        BEGIN

```

```
        n := n + 1;
        EqWDec[n] := Decision;
    END;
```

```
END;
```

```
END; (* DoEqualWeight *)
```

```
PROCEDURE DoMCD;
```

```
(* Majority of Confirming Dimensions. In Timed Riskless SIM, if time *)
(* limit reached and current best is available, it becomes the choice *)
(* else a choice is made at random. *)
```

```
VAR Deciding: BOOLEAN;
```

```
BEGIN
```

```
    Deciding := TRUE;
```

```
    TimeUp := FALSE;
```

```
    Time[Rule] := 0.0; (* Reinit counter for this iteration. *)
```

```
    WHILE ((Deciding) AND (TimeUp=FALSE)) DO
```

```
        (* Sets out-of-time condition in Timed Riskless SIM: *)
```

```
        IF Time[Rule] >= TimeLimit THEN
```

```
            BEGIN
```

```
                Deciding := FALSE;
```

```
                TimeUp := TRUE;
```

```
            END
```

```
(* 1 *)
```

```
ELSE IF (Cardinality(Altern) = 1) THEN (* Only best alt left. *)
```

```
    BEGIN
```

```
        Deciding := FALSE;
```

```
        Decision := CurrValue(Altern);
```

```
        (* For debug; external to rule: *)
```

```
        IF (WinsOut=TRUE) AND (m < 10) THEN *)
```

```
            BEGIN
```

```
                m := m + 1;
```

```
                MCDDec[m] := CurrValue(Altern);
```

```
            END;
```

```
    END
```

```
(* 2 *)
```

```
ELSE IF (NOT AtEnd(Attrib)) AND (NOT AtEnd(Altern))
```

```
    AND (IsEmpty(3)) THEN
```

```
    BEGIN
```

```
        Remember(1);
```

```
        GetNext(Altern);
```

```
        Remember(2);
```

```
        GetMax(1,2,3);
```

```
    END
```

```
(* * * * * Register a vote for Winner * * * * * *)
```

```
(* The two alts are compared, att by att. The winning value on ea *)
```

```
(* compare either increments (for 1st alt) or decrements (for 2d *)
```

```
(* alt) the neutral value in STM Loc 4. If at end the value in 4 *)
```

```

(* is positive, then the 1st alt has won overall; if negative, the *)
(* 2d alt has won; if zero, a tie. *)

(* 3A *)
ELSE IF (NOT IsEmpty(3)) AND (STM[1].AValue = STM[3].AValue) THEN
(* First alt wins; increment. *)
  BEGIN
    Add1(4);          (* Add to STM Loc 4. *)
    Forget(3);        (* We can compare a new pair of alts. *)
    GetNext(Attrib);
    GetPrev(Altern);
  END

(* 3B *)
ELSE IF (NOT IsEmpty(3)) AND (STM[2].AValue = STM[3].AValue) THEN
(* Second alt wins; decrement. *)
  BEGIN
    Subt1(4);         (* Subtract from STM Loc 4. *)
    Forget(3);        (* We can compare a new pair of alts. *)
    GetNext(Attrib);
    GetPrev(Altern);
  END

(*      Is Winner 1st Alt, 2d Alt or Tie; More or At End? *)
(* All the productions below imply AtEnd(Attrib) is true. *)
(* 4A *)
ELSE IF (Cardinality(Altern)>2) AND (STM[4].AValue > 0.0) THEN
(* Winner is 1st alt considered; there are more alts left. *)
  BEGIN
    SetPoint(2);
    Elim(Altern);     (* Mark off the loser in the list. *)
    SetPoint(1);     (* Set to winner; att always last att. *)
    GetNext(Attrib); (* Sets to AtEnd mark for atts. *)
    GetNext(Attrib); (* Sets to first att. *)
    Forget(4);       (* Clear out for next compare of alts. *)
  END

(* 4B *)
ELSE IF (Cardinality(Altern)=2) AND (STM[4].AValue > 0.0) THEN
(* Winner is 1st alt considered; there are no alts left. *)
  BEGIN
    SetPoint(2);
    Elim(Altern);     (* Leaves cardinality of altern at 1. *)
    SetPoint(1);     (* Make 1st alt considered current. *)
  END

(* 5A *)
ELSE IF (Cardinality(Altern) > 2) AND (STM[4].AValue < 0.0) THEN
(* Winner is 2d alt considered; there are more alts left. *)
  BEGIN
    SetPoint(1);
    Elim(Altern);
    SetPoint(2);     (* Sets to winner; att always last. *)
    GetNext(Attrib); (* Sets to AtEnd mark for atts. *)
    GetNext(Attrib); (* Sets to first att. *)
    Forget(4);
  END

(* 5B *)

```

```

ELSE IF (Cardinality(Altern) = 2) AND (STM[4].AValue < 0.0) THEN
  (* Winner is 2d alt considered; there are no alts left. *)
  BEGIN
    SetPoint(1);
    Elim(Altern);
    SetPoint(2);      (* Make 2d alt considered the current alt. *)
  END

```

```

(* 6A *)
ELSE IF (Cardinality(Altern) > 2) AND (STM[4].AValue = 0.0) THEN
  (* Tie; there are more alts left. *)
  BEGIN
    GetMin(1,2,3);      (* Find the loser and mark it off on list. *)
    SetPoint(3);
    Elim(Altern);
    GetMax(1,2,3);      (* Find the winner and get a challenger. *)
    SetPoint(3);        (* Sets to winner; att always last. *)
    GetNext(Attrib);    (* Sets to AtEnd mark for atts. *)
    GetNext(Attrib);    (* Sets to first att. *)
    Forget(4);
    MCDTieCnt:=MCDTieCnt + 1; (* Ctr external to rule... *)
  END

```

```

(* 6B *)
ELSE IF (Cardinality(Altern) = 2) AND (STM[4].AValue = 0.0) THEN
  (* Tie; there are no alts left. *)
  BEGIN
    GetMin(1,2,3);      (* Find the loser and mark it off on list. *)
    SetPoint(3);
    Elim(Altern);
    GetMax(1,2,3);      (* In case of a tie, overall winner is the *)
    SetPoint(3);        (* winner of compare on last att. *)
    MCDTieCnt:=MCDTieCnt+1; (* Ctr external to rule... *)
  END;
  (* WHILE *)

```

```

IF (TimeUp=TRUE) THEN
  BEGIN
    IF STM[2].Alt <= 2 THEN      (* At least one complete comparison *)
      DoRand(Decision)          (* required for a designated current*)
    ELSE                          (* best; ie-STM[2] alt at least 3. *)
      Decision := STM[1].Alt;

    MCDLimit := MCDLimit + 1;

    (* For debug; external to rule: *)
    IF (WinsOut=TRUE) AND (m < 10) THEN
      BEGIN
        m := m + 1;
        MCDDec[m] := Decision;
      END;
    END;

  END;

END;

END; (* DoMCD *)

```



```

BEGIN

    Deciding := FALSE;
    TimeUp   := TRUE;
END

    (* 1 *)
ELSE IF AtEnd(Altern) THEN
    BEGIN
        Deciding:= FALSE;      (* Exhausted all alternatives.*)
        Decision:= STM[5].Alt;
        (* For debug; external to rule: *)
        IF (WinsOut=TRUE) AND (1 < 10) THEN (* Put winner in array *)
            BEGIN (* and output to TraceOut *)
                l := l + 1; (* file. *)
                EEUDec[1] := Decision;
            END;
    END

    (* 2 *)
END ELSE IF AtEnd(Attrib) THEN (* End of this Alt's Att's *)
    BEGIN
        GetMax(4,5,5); (* Get largest value. *)
        Forget(4); (* Init for new value calculation, *)
        GetNext(Altern); (* and move on. *)
        GetNext(Attrib); (* Sets att to 1. Att always at the*)
        (* at-end value of -1 here. *)

    (* 3 *)
END ELSE IF (IsEmpty(4)) THEN (* First attribute case. *)
    BEGIN
        Remember(1);
        GetWeight(2);
        GetNext(Attrib);
        Mult(1,2,4); (* Put result directly into accum. *)
    END

    (* 4 *)
ELSE (* Else add in the weighted value of this att *)
    BEGIN
        Remember(1); (* The attribute value. *)
        GetWeight(2); (* The attribute weight. *)
        GetNext(Attrib); (* Riskless GetNext skips weight. *)
        Mult(1,2,3); (* The total weight. *)
        Add(3,4,4); (* Add this weight in. *)

        END; (* TimedAU Code Main WHILE Loop Ends ***** *)

    (***** AU Processing if Out of Time Condition Reached: *****)
    IF (TimeUp=TRUE) THEN
        BEGIN
            TimeUp := FALSE; (* Set to F as a switch. *)
            IF STM[5].Alt > 0 THEN
                Decision := STM[5].Alt
            ELSE
                DoRand(Decision);

            EEULimit := EEULimit + 1;

```

```

(* For Debug, external to rule: *)
IF (WinsOut=TRUE) AND (l<10) THEN
BEGIN
  l := l + 1;
  EEUDec[l] := Decision;
END;

```

```

Deciding := FALSE;
END; (* IF TimeUp *)

```

(\*\*\*\*\* END of Timed AU Code \*\*\*\*\*)

```

END ELSE IF (AtEnd(Altern)) THEN
(* We have eliminated all we can with this attribute. *)

```

```

BEGIN
  Elim(Attrib);
  SetPoint(5); (* Go back to start. *)
  Forget(6); (* Marks that we need a new most *)
  (* important attribute. *)
  Forget(5);
  Forget(2); (* Marks need for new cutoff. *)

```

```

END ELSE IF (AtEnd(Attrib) AND NOT IsEmpty(6)) THEN
(* We have the most important attribute, so start processing: *)

```

```

BEGIN
  SetPoint(6);
  Remember(1);
  GetCut(1,2);
  GetMin(1,2,3); (* Get min of cutoff or value. *)

```

```

END ELSE IF NOT IsEmpty(3) AND (STM[3].Alt<>CutOffVal) THEN
(* The current attribute did not meet the cutoff; it was the min. *)

```

```

BEGIN
  Elim(Altern);
  Forget(3);

```

```

END ELSE IF NOT IsEmpty(3) AND (STM[3].Alt = CutOffVal) THEN
(* The current attribute met the cutoff; cutoff was the min. *)

```

```

BEGIN
  GetNext(Altern);
  Forget(3);

```

```

END ELSE IF (IsEmpty(2) AND IsEmpty(4) AND IsEmpty(5)) THEN
(* Initialize search for the most important attribute. *)

```

```

BEGIN
  GetWeight(5);
  GetNext(Attrib); (* Riskless GetNext skips wgts. *)
  GetMax(5,5,6);

```

```

END ELSE IF (IsEmpty(2) AND IsEmpty(4) AND NOT IsEmpty(6) ) THEN
(* Continue search for the most important attribute. *)

```

```

BEGIN
  GetWeight(4);
  GetMax(4,6,6); (* Current winner. *)
  Forget(4); (* Mark that we still need one. *)
  GetNext(Attrib); (* Riskless GetNext skips wgts. *)

```

```

END ELSE
(* Check this attribute against the cutoff. *)
BEGIN
  Remember(1);
  GetMin(1,2,3); (* Min of cutoff and value. *)
END; (* Main, Outer WHILE Loop *****)

(* Outer loop processing if time up condition entered: *****)
IF (TimeUp=TRUE) AND (Deciding=FALSE) THEN (* IE- enter to end *)
BEGIN (* processing only if *)
  DoRand(Decision); (* MCD code hasn't been*)
  EEULimit := EEULimit + 1; (* used. *)

  (* For debug; external to rule: *)
  IF (WinsOut=TRUE) AND (l < 10) THEN (* Put winner in array *)
  BEGIN (* and output to TraceOut *)
    l := l + 1; (* file. *)
    EEUDec[l] := Decision;
  END;
END;

END; (* DoEBAEU *)

```

```
PROCEDURE DoEBAMCD;
```

```
VAR Deciding: BOOLEAN;
```

```
BEGIN (* DoEBAMCD *)
```

```

Deciding := TRUE;
TimeUp := FALSE;
Time[Rule] := 0.0; (* Reinit counter for this iteration. *)

```

```
WHILE ((Deciding) AND (TimeUp=FALSE)) DO
```

```
(* Sets out-of-time condition in Timed Riskless SIM: *)
```

```
IF Time[Rule] >= TimeLimit THEN
BEGIN
```

```

  Deciding := FALSE;
  TimeUp := TRUE;

```

```
END
```

```
(* 1 *)
```

```

(* A col of atts is processed together...the IsEmpty(2) marker *)
(* isn't true until the whole column has been processed. If *)
(* only 1 alt is left in a col, it's taken as the decision. *)

```

```
ELSE IF (Cardinality(Altern)=1) AND (NOT AtEnd(Altern)) THEN
BEGIN
```

```

  Deciding := FALSE; (* Only 1 alt left in this column. *)
  Decision := CurrValue(Altern);
  (* For debug, external to rule: *)

```

```

IF (WinsOut=TRUE) AND (k < 10) THEN
BEGIN
    k := k + 1;
    ECDDec[k] := Decision;
END;
END

(* 2 *)
ELSE IF (Cardinality(Attrib) < 1) THEN
(* We checked all attributes and more than one alternative is left, *)
(* so choose at random. *)
BEGIN
    DoRand(Decision);
    Deciding:= FALSE;
    (* For debug; external to rule: *)
    IF (WinsOut = TRUE) AND (k < 10) THEN
    BEGIN
        k := k + 1;
        ECDDec[k] := Decision;
    END;

(*****
(* Begin MCD Rule when: *)
(* a) Processing complete on all alts of current most-likely att. *)
(* Ie- IsEmpty(2) is true = marker that col is finished. *)
(* b) Three or fewer alts are left in matrix. *)
(* NB- If alts in matrix are eliminated down to one during evaluation*)
(* of one att, then processing ends via EBA rule, w/that last alt. *)
(*****

(* 3 *)
END ELSE IF (IsEmpty(2)) AND (Cardinality(Altern)<4) THEN

BEGIN (* MCD Rule Processing Main Loop: *)

(* MCD While Loop *)
WHILE ((Deciding) AND (TimeUp=FALSE)) DO

    (* Sets out-of-time condition in Timed Riskless SIM: *)

    IF Time[Rule] >= TimeLimit THEN
    BEGIN

        Deciding := FALSE; (* Directs processing out of main MCD *)
        TimeUp := TRUE; (* WHILE loop to Time Up paragraph. *)
    END

(* 1 MCD *)
ELSE IF (Cardinality(Altern) = 1) THEN (* Only best alt left. *)
BEGIN
    Deciding := FALSE;
    Decision := CurrValue(Altern);
    (* For debug; external to rule: *)
    IF (WinsOut=TRUE) AND (k < 10) THEN (* Put winner in array & *)
    BEGIN (* output to TraceOut *)
        k := k + 1; (* file. *)
        ECDDec[k] := CurrValue(Altern);
    END;

```

```

END

(* 2 *)
ELSE IF (NOT AtEnd(Attrib)) AND (NOT AtEnd(Altern))
AND (IsEmpty(3)) THEN
BEGIN
Remember(1);
GetNext(Altern);
Remember(2);
GetMax(1,2,3);
END

(* 3A *)
ELSE IF (NOT IsEmpty(3)) AND (STM[1].AValue = STM[3].AValue) THEN
(* First alt wins; increment. *)
BEGIN
Add1(4);          (* Add to STM Loc 4. *)
Forget(3);        (* We can compare a new pair of alts. *)
GetNext(Attrib);
GetPrev(Altern);
END

(* 3B *)
ELSE IF (NOT IsEmpty(3)) AND (STM[2].AValue = STM[3].AValue) THEN
(* Second alt wins; decrement. *)
BEGIN
Subt1(4);         (* Subtract from STM Loc 4. *)
Forget(3);        (* We can compare a new pair of alts. *)
GetNext(Attrib);
GetPrev(Altern);
END

(* 4A *)
ELSE IF (Cardinality(Altern)>2) AND (STM[4].AValue > 0.0) THEN
(* Winner is 1st alt considered; there are more alts left. *)
BEGIN
SetPoint(2);
Elim(Altern);    (* Mark off the loser in the list. *)
SetPoint(1);    (* Set to winner; att always last att. *)
GetNext(Attrib); (* Sets to AtEnd mark for atts. *)
GetNext(Attrib); (* Sets to first att. *)
Forget(4);      (* Clear out for next compare of alts. *)
END

(* 4B *)
ELSE IF (Cardinality(Altern)=2) AND (STM[4].AValue > 0.0) THEN
(* Winner is 1st alt considered; there are no alts left. *)
BEGIN
SetPoint(2);
Elim(Altern);    (* Leaves cardinality of altern at 1. *)
SetPoint(1);    (* Make 1st alt considered current. *)
END

(* 5A *)
ELSE IF (Cardinality(Altern) > 2) AND (STM[4].AValue < 0.0) THEN
(* Winner is 2d alt considered; there are more alts left. *)
BEGIN
SetPoint(1);
Elim(Altern);
SetPoint(2);    (* Sets to winner; att always last. *)

```

```

    GetNext(Attrib);    (* Sets to AtEnd mark for atts.          *)
    GetNext(Attrib);    (* Sets to first att.              *)
    Forget(4);
END

(* 5B *)
ELSE IF (Cardinality(Altern) = 2) AND (STM[4].AValue < 0.0) THEN
    (* Winner is 2d alt considered; there are no alts left.      *)
    BEGIN
        SetPoint(1);
        Elim(Altern);
        SetPoint(2);    (* Make 2d alt considered the current alt. *)
    END

(* 6A *)
ELSE IF (Cardinality(Altern) > 2) AND (STM[4].AValue = 0.0) THEN
    (* Tie; there are more alts left.                             *)
    BEGIN
        GetMin(1,2,3);    (* Find the loser and mark it off on list. *)
        SetPoint(3);
        Elim(Altern);
        GetMax(1,2,3);    (* Find the winner and get a challenger.  *)
        SetPoint(3);    (* Sets to winner; att always last.      *)
        GetNext(Attrib);  (* Sets to AtEnd mark for atts.          *)
        GetNext(Attrib);  (* Sets to first att.                    *)
        Forget(4);
    END

(* 6B *)
ELSE IF (Cardinality(Altern) = 2) AND (STM[4].AValue = 0.0) THEN
    (* Tie; there are no alts left.                             *)
    BEGIN
        GetMin(1,2,3);    (* Find the loser and mark it off on list. *)
        SetPoint(3);
        Elim(Altern);
        GetMax(1,2,3);    (* In case of a tie, overall winner is the *)
        SetPoint(3);    (* winner of compare on last att.        *)
    END;

    (* END WHILE. MCD code main loop. ***** *)

    (***** Time up processing for MCD code: ***** *)
    IF (TimeUp=TRUE) THEN
        BEGIN
            TimeUp := FALSE; (* Switch. Outer WHILE MCD loop over, and DECI-*)
            (* DING=FALSE. Setting TimeUp to FALSE here prevents us from *)
            (* entering the last, outer IF TIMEUP=TRUE EBA paragraph at *)
            (* end. Set false as a convenient switch only.                *)
            IF STM[2].Alt <= 2 THEN    (* At least one complete comparison *)
                DoRand(Decision)    (* required for a designated current*)
            ELSE
                (* best; ie-STM[2] alt at least 3. *)
                Decision := STM[1].Alt;
            END;

            ECDDLimit := ECDDLimit + 1;

            (* For debug; external to rule:                             *)
            IF (WinsOut=TRUE) AND (k < 10) THEN
                BEGIN
                    k := k + 1;
                    ECDDec[k] := Decision;
                END;
            END;

```

```

END; (* MCD Code Processing *****)

(* 4 *)
END ELSE IF (AtEnd(Altern) ) THEN
(* We have eliminated all we can with this attribute. *)
BEGIN
    Elim(Attrib);
    SetPoint(5); (* Go back to start. *)
    Forget(6); (* Marks that we need a new most *)
                (* important attribute. *)
    Forget(5);
    Forget(2); (* Marks need for new cutoff. *)

```

```

(* 5 *)
END ELSE IF (AtEnd(Attrib) AND NOT IsEmpty(6)) THEN
(* We have the most important attribute, so start processing: *)
BEGIN
    SetPoint(6);
    Remember(1);
    GetCut(1,2);
    GetMin(1,2,3); (* Get min of cutoff or value. *)

```

```

(* 6 *)
END ELSE IF NOT IsEmpty(3) AND (STM[3].Alt<>CutOffVal) THEN
(* The current attribute did not meet the cutoff; it was the min. *)
BEGIN
    Elim(Altern);
    Forget(3);

```

```

(* 7 *)
END ELSE IF NOT IsEmpty(3) AND (STM[3].Alt = CutOffVal) THEN
(* The current attribute met the cutoff; cutoff was the min. *)
BEGIN
    GetNext(Altern);
    Forget(3);

```

```

(* 8 *)
END ELSE IF (IsEmpty(2) AND IsEmpty(4) AND IsEmpty(5)) THEN
(* Initialize search for the most important attribute. *)
BEGIN
    GetWeight(5);
    GetNext(Attrib); (* Riskless GetNext skips wgts. *)
    GetMax(5,5,6);

```

```

(* 9 *)
END ELSE IF (IsEmpty (2) AND IsEmpty(4) AND NOT IsEmpty(6) ) THEN
(* Continue search for the most important attribute. *)
BEGIN
    GetWeight(4);
    GetMax(4,6,6); (* Current winner. *)
    Forget(4); (* Mark that we still need one. *)
    GetNext(Attrib); (* Riskless GetNext skips wgts. *)

```

```

(* 10 *)

```

```

END ELSE
(* Check this attribute against the cutoff. *)
BEGIN
  Remember(1);
  GetMin(1,2,3);          (* Min of cutoff and value. *)

  END;  (* WHILE; main outer loop ends here. *****)

(* Timed code if rule ends while in the EBA portion...see alternative *)
(* ending above if rule ends while in the MCD portion. If it ends in *)
(* MCD it should never enter the code below because MCD sets TimeUp to*)
(* FALSE as a switch, which should cause exit of ALL processing. *)
  IF (TimeUp=TRUE) AND (Deciding=FALSE) THEN
  BEGIN
    Deciding := FALSE;
    DoRand(Decision);
    ECDCLimit := ECDCLimit + 1;

    (* For debug; external to rule: *)
    IF (WinsOut=TRUE) AND (k < 10) THEN (* Put winner in array & *)
    BEGIN (* output to TraceOut *)
      k := k + 1; (* file. *)
      ECDDec[k] := Decision;
    END;
  END;

END; (* DoEBAMCD *)

```

```

PROCEDURE DoAddUtility;
(* NOT TIMED... run as baseline. See rule called TimedAU for the *)
(* timed version of this rule. *)

```

```

  VAR Deciding: BOOLEAN;

```

```

  BEGIN (*DoAddUtility*)

```

```

    Deciding := TRUE;

```

```

    WHILE (Deciding) DO

```

```

      (* 1 *)

```

```

    IF AtEnd(Altern) THEN

```

```

      BEGIN

```

```

        Deciding:= FALSE; (* Exhausted all alternatives.*)
        Decision:= STM[5].Alt;

```

```

      (* 2 *)

```

```

    END ELSE IF AtEnd(Attrib) THEN (* End of this Alt's Att's *)

```

```

      BEGIN

```

```

        GetMax(4,5,5); (* Get largest value. *)
        Forget(4); (* Init for new value calculation, *)
        GetNext(Altern); (* and move on. *)
        GetNext(Attrib); (* Sets att to 1. Att always at the*)
        (* at-end value of -1 here. *)

```

```

      (* 3 *)

```

```

END ELSE IF (IsEmpty(4)) THEN (* First attribute case. *)
  BEGIN
    Remember(1);
    GetWeight(2);
    GetNext(Attrib);
    Mult(1,2,4); (* Put result directly into accum. *)
  END

```

```
(* 4 *)
```

```

ELSE (* Else add in the weighted value of this att *)
  BEGIN
    Remember(1); (* The attribute value. *)
    GetWeight(2); (* The attribute weight. *)
    GetNext(Attrib); (* Riskless GetNext skips weight. *)
    Mult(1,2,3); (* The total weight. *)
    Add(3,4,4); (* Add this weight in. *)

    END; (* WHILE *)

```

```
END; (* DoAddUtility *)
```

```
PROCEDURE DoTimedAU;
```

```

(* This is the TIMED version of the above rule. *)
(* For Timed Riskless SIM, if time limit reached and a current best *)
(* is available, take it as the decision, else choose at random. *)

```

```
VAR Deciding: BOOLEAN;
```

```
BEGIN (* DoTimedAU *)
```

```

  Deciding := TRUE;
  TimeUp := FALSE;
  Time[Rule] := 0.0; (* Reinit counter for this iteration. *)

```

```
WHILE ((Deciding) AND (TimeUp=FALSE)) DO
```

```

  (* Sets out-of-time condition in Timed Riskless SIM: *)
  IF Time[Rule] >= TimeLimit THEN
    BEGIN

```

```

      Deciding := FALSE;
      TimeUp := TRUE;

```

```
    END
```

```
(* 1 *)
```

```
ELSE IF AtEnd(Altern) THEN
```

```
  BEGIN
```

```
    Deciding:= FALSE; (* Exhausted all alternatives. *)
```

```
    Decision:= STM[5].Alt;
```

```
    (* For debug; external to rule: *)
```

```
    IF (WinsOut=TRUE) AND (r < 10) THEN
```

```
      BEGIN
```

```
        r := r+1;
```

```
        AdUDec[r] := STM[5].Alt;
```

```
      END;
```

```

      (* 2 *)
END ELSE IF AtEnd(Attrib) THEN (* End of this Alt's Att's *)
  BEGIN
    GetMax(4,5,5); (* Get largest value. *)
    Forget(4); (* Init for new value calculation, *)
    GetNext(Altern); (* and move on. *)
    GetNext(Attrib); (* Sets att to 1. Att always at the*)
    (* at-end value of -1 here. *)

      (* 3 *)
END ELSE IF (IsEmpty(4)) THEN (* First attribute case. *)
  BEGIN
    Remember(1);
    GetWeight(2);
    GetNext(Attrib);
    Mult(1,2,4); (* Put result directly into accum. *)
  END

      (* 4 *)
ELSE (* Else add in the weighted value of this att *)
  BEGIN
    Remember(1); (* The attribute value. *)
    GetWeight(2); (* The attribute weight. *)
    GetNext(Attrib); (* Riskless GetNext skips weight. *)
    Mult(1,2,3); (* The total weight. *)
    Add(3,4,4); (* Add this weight in. *)

    END; (* WHILE *)

  IF (TimeUp=TRUE) THEN
  BEGIN
    IF STM[5].Alt > 0 THEN (* If a current best is avail, *)
      Decision := STM[5].Alt (* take it. *)
    ELSE
      DoRand(Decision);

    AdULimit := AdULimit +1;

    IF (WinsOut=TRUE) AND (r < 10) THEN
    BEGIN
      r := r+1;
      AdUDec[r] := Decision;
    END;

  END;

END; (* DoTimedAU *)

```

```

PROCEDURE DoSatisficing;

```

```

(* Starts with the first alternative and looks at its first attri- *)
(* bute. If the att is >= CutOffValue, the next att in the alt is *)
(* considered. If all atts in the alt meet the test, that alt is *)
(* chosen. If one of the atts is < CutOffValue, no other atts in *)
(* that alt are considered and the first att in the next alt is *)
(* tested. If no alt has atts that all meet the CutOffValue, an *)
(* alt is chosen at random. Production order important for rule *)
(* function. *)

```

```

VAR    Deciding: BOOLEAN;

BEGIN (* DoSatisficing *)

Deciding    :=TRUE;
TimeUp      := FALSE;
Time[Rule] := 0.0; (* Reinit counter for this iteration. *)

    WHILE ((Deciding) AND (TimeUp=FALSE)) Do

        (* Sets out-of-time condition for Timed Riskless SIM: *)
        IF Time[Rule] >= TimeLimit THEN
            BEGIN
                Deciding := FALSE;
                TimeUp    := TRUE;
            END

(* 1 *)
        ELSE IF AtEnd(Altern) THEN
            (* All alts have been considered; none have atts that all meet *)
            (* CutOffValue: *)
            BEGIN
                DoRand(Decision);          (* Pick an alt choice randomly. *)
                Deciding := FALSE;
                SatRndCnt:= SatRndCnt+1;(* Counter external to rule... *)
                (* For debug; also external to rule: *)
                IF (WinsOut = TRUE) AND (j < 10) THEN
                    BEGIN
                        j := j+1;
                        SatDec[j] := CurrValue(Altern);
                    END;
                END (* IF *)
            END

(* 2 *)
        ELSE IF (AtEnd(Attrib)) AND (STM[2].AValue = STM[3].AValue) THEN
            (* Alt failed on last att; special last-att case. *)
            BEGIN
                GetNext(Altern);
                GetNext(Attrib);          (* Sets to first att in list. *)
                Forget(1);
            END

(* 3 *)
        ELSE IF (NOT AtEnd(Attrib)) AND (NOT IsEmpty(1))
            AND (STM[2].AValue = STM[3].AValue) THEN
            (* Alt failed before last att; cycle back to AtEnd of att list. *)
            (* After cycle ends, following production fires. *)
            GetPrev(Attrib)              (* Loops until AtEnd(Attrib). *)

(* 4 *)
        ELSE IF (AtEnd(Attrib)) AND (IsEmpty(1)) THEN
            BEGIN
                Deciding := FALSE;
                Decision := CurrValue(Altern);
                SatRulCnt:= SatRulCnt+1;(* Counter external to rule... *)
                (* For debug; also external to rule: *)
                IF (WinsOut = TRUE) AND (j < 10) THEN

```

```

        BEGIN
            j := j + 1;
            SatDec[j] := CurrValue(Altern);
        END;
    END

```

```

(* 5 *)
ELSE IF (AtEnd(Attrib)) AND (STM[1].AValue = STM[3].AValue) THEN
    (* Implied: NOT IsEmpty(1); *)
    (* Alt passed on last att; special last-att case. *)
    Forget(1)
        (* The next production to fire will *)
        (* be the decision. *)

```

```

(* 6 *)
ELSE IF (IsEmpty(1)) THEN
    (* Implied: NOT AtEnd *)
    (* See if an att passes the cutoff. *)
    BEGIN
        Remember(1);
        GetCut(2,2);
        GetMax(1,2,3);
        GetNext(Attrib);
    END

```

```

(* 7 *)
ELSE IF STM[1].AValue = STM[3].AValue THEN
    (* Implied: NOT IsEmpty(1) and NOT AtEnd(Attrib). *)
    (* Alt passed before last att; get the next to test. *)
    BEGIN
        Forget(1);
    END;
    (* WHILE *)

```

```

IF (TimeUp=TRUE) THEN
    BEGIN
        DoRand(Decision);
        SatLimit := SatLimit + 1;

        SatRndCnt:= SatRndCnt+1;(* Counter external to rule... *)
        (* For debug; also external to rule: *)
        IF (WinsOut = TRUE) AND (j < 10) THEN
            BEGIN
                j := j+1;
                SatDec[j] := CurrValue(Altern);
            END;
        END;
    END;

```

```

END; (* DoSatisficing *)

```

```

(* * * * * * * * * * * * * * * * * * * * * * * * * * * * * * * * * * * * * * * * * * * * * * * * * * * * * *)
(* Run the rules. *)
(* * * * * * * * * * * * * * * * * * * * * * * * * * * * * * * * * * * * * * * * * * * * * * * * * * * * * *)

```

```

PROCEDURE DoARule;

    VAR AltNum,AttNum: INTEGER;

```

```
L: MemLoc;
O: OperResults;
Spread: REAL;
```

```
BEGIN (* DoARule *)
  (* initialize alternative list *)
  clrmsguu(24,40,40);
  errmsguu(24,40,0,15,'Initializing Lists...');)
  InitList(Altern);

  FOR AltNum:= 1 TO NAlternatives DO BEGIN
    PutValue(Altern,AltNum);

    (* Get normative choice *)
    IF ChoiceRanking[AltNum] = 1 THEN AltAU := AltNum;

    (* Get normative choice for utility *)
    IF ChoiceURank[AltNum] = 1 THEN UAltAU := AltNum;
  END;

  CloseListAdditions(Altern);

  (* Initialize attribute list *)
  InitList(Attrib);
  FOR AttNum:= 1 TO NAttributes DO BEGIN
    PutValue(Attrib,AttNum);
    PutValue(Attrib,(AttNum + NAttributes));
  END; (* FOR *)

  CloseListAdditions(Attrib);

  (* Clear out memory. *)
  FOR L:= 1 TO NMemCell DO
  WITH STM[L] DO
  BEGIN
  OpType := Empty;
  Alt := 0;
  Att := 0;
  AValue := 0.0;
  END; {WITH}

  (* Clear out the operation counts *)
  FOR O:= Empty TO AttAbsence DO
  OperationCount[O]:= 0;

  cursetvv(24,40);
  write(output,'
  cursetvv(24,40);
  write(output,'Performing: ',rule);

CASE rule OF
  Rand:
    BEGIN
```



```

MeanData[Rule].ChoiceURank := MeanData[Rule].ChoiceURank +
    ChoiceURank[AltNum];

FOR O:= Empty TO AttAbsence DO
    MeanData[Rule].OperationCount[O] :=
        MeanData[Rule].OperationCount[O]
        +OperationCount[O];

StdData[Rule].DomValues := StdData[Rule].DomValues +
    SQR (DomValues[AltNum]);
StdData[Rule].DomExist := StdData[Rule].DomExist +
    SQR(DomExist);
StdData[Rule].ChoiceValues := StdData[Rule].ChoiceValues +
    SQR(ChoiceValues[AltNum]);
StdData[Rule].ChoiceRanking := StdData[Rule].ChoiceRanking +
    SQR(ChoiceRanking[AltNum]);
StdData[Rule].ChoiceUtils := StdData[Rule].ChoiceUtils +
    SQR(ChoiceUtils[AltNum]);
StdData[Rule].ChoiceURank := StdData[Rule].ChoiceURank +
    SQR(ChoiceURank[AltNum]);

FOR O:= Empty TO AttAbsence DO
    StdData[Rule].OperationCount[O] :=
        StdData[Rule].OperationCount[O] +
        SQR(OperationCount[O]);

Used[Rule] := TRUE {Remember that we used this one}

    END; (* DoARule *)
{$list+}
END. {Unit}

```

```
{Interface for FFORMSUU, Fast Forms Utility. These are a series of }  
{general purpose routines to assist in screen handling. }
```

```
{Version 2.0 (C)Copyright Blaise Computing, Inc. 1982 }
```

```
interface; unit fformsuu(alarmuu,abortuu,errmsguu,clrmsguu,inkeyuu,  
                        pauseuu);
```

```
procedure alarmuu;
```

```
procedure abortuu (const msg : lstring);
```

```
procedure errmsguu(row,col,fore,back : byte; const msg : lstring);
```

```
procedure clrmsguu(row,col,len : byte);
```

```
function inkeyuu (var ch : char) : boolean;
```

```
procedure pauseuu (const msg : lstring);
```

```
begin
```

```
end;
```

```

INTERFACE;
UNIT LSTPRIMS (MostFix, AtEnd, Cardinality, CurrValue, GetNext, GetPrev,
              SetPoint, Elim, InitList, PutValue, CloseListAdditions);
USES SIM;
(* * * * * * * * * * * * * * * * * * * * * * * * * * * * * * * * * * *)
(* Primitive routines for handling the attribute and alternative lists *)
(* * * * * * * * * * * * * * * * * * * * * * * * * * * * * * * * * * *)

FUNCTION MostFix(List: MemListType): BOOLEAN [PURE];

FUNCTION AtEnd(List: MemListType): BOOLEAN [PURE];
(* Is the List at the end marker? *)

FUNCTION Cardinality(List: MemListType): INTEGER [PURE];
(* Does this list have zero or one element (besides the header) *)

FUNCTION CurrValue(List: MemListType): INTEGER [PURE];
(* Returns current value pointed to on List *)

PROCEDURE GetNext(List: MemListType);
(* Advances to next non-deleted element of list. Assumes list is not empty. *)

PROCEDURE GetPrev(List: MemListType);
(* Moves back to first previous non-deleted element of list.
   Assumes list is not empty. *)

PROCEDURE SetPoint ( L: MemLoc);
(* Moves the alternative or attribute in L to the appropriate pointer *)
(* Saves the current Alt and Att in memory location *)

PROCEDURE Elim(List: MemListType);
(* Deletes current element from list (eliminates it from consideration) *)

(* * The following routines are for initializing and filling lists. * * * *)

PROCEDURE InitList(List: MemListType);
(* Initializes List to an empty list open for additions. *)

PROCEDURE PutValue(List: MemListType; Val: INTEGER);
(* Creates a new element at end of List. Assumes AtEnd is true. *)

PROCEDURE CloseListAdditions(List: MemListType);
(* Initializes List to an empty list open for additions. *)

END; {Interface}

```

```

(*****
(* VERSION 1.2                                TIMED RISKLESS SIM      *)
(* LSTPRIMS.PAS                               11/12/85                *)
(*****
(* GetNext and GetPrev made generic to handle both risky and risk- *)
(* less. SetPoint revised to handle empty (eliminated Alterns and *)
(* Attribs) cells in the Contents array. Elim modified for risk- *)
(* attribute handling; also, operationcounts distinguished to show *)
(* elimination of alternatives vs attributes.                        *)
(* "Time/weight" values for each operation proc read from an array *)
(* called OpWtArr, whose values are supplied by the user via an *)
(* external file, WtsFile, in SIM.PAS.                             *)
(*****

{$INCLUDE:'sim.int'}
{$INCLUDE:'lstprims.int'}
{$INCLUDE:'stmprims.int'}
IMPLEMENTATION OF LSTPRIMS;
USES SIM,stmprims;
( * * * * * * * * * * * * * * * * * * * * * * * * * * * * * * * * * * *)
(* Primitive routines for handling the attribute and alternative lists *)
( * * * * * * * * * * * * * * * * * * * * * * * * * * * * * * * * * *)

FUNCTION MostFix;
  {(List: MemListType): BOOLEAN [PURE]}
  (* tests pointer for end of attributes in DoMostLikely *)

  BEGIN (* MostFix *)
    WITH MemLists[List] DO
      MostFix:= Pointer = (2 * NAttributes);
    END; (* MostFix *)

FUNCTION AtEnd;
  {(List: MemListType): BOOLEAN [PURE]}
  (* Is the List at the end marker? *)

  BEGIN (* AtEnd *)
    WITH MemLists[List] DO
      AtEnd:= Pointer = 0;
      TraceSTM('AtEnd',0,0,0);
    END; (* AtEnd *)

FUNCTION Cardinality;
  {(List: MemListType): INTEGER [PURE]}
  (* Does this list have zero or one element (besides the header) *)

  BEGIN (* Cardinality *)
    WITH MemLists[List] DO
      Cardinality:= NContent;
      TraceSTM('Cardinality',0,0,0);
    END; (* Cardinality *)

FUNCTION CurrValue;
  {(List: MemListType):INTEGER [PURE]}
  (* Returns current value pointed to on List *)

```

```

BEGIN (* CurrValue *)
    WITH MemLists[List] DO
        CurrValue:= Contents[Pointer];
END; (* CurrValue *)

```

```

PROCEDURE GetNext;
{(List: MemListType)}
(* Advances to next non-deleted element of list. Assumes list is not empty. *)

```

```

VAR TimeVal: REAL;

```

```

BEGIN (* GetNext *)
    WITH MemLists[List] DO
        REPEAT
            Pointer:= (Pointer + 1) MOD (TotContent + 1);
            UNTIL (Contents[Pointer] <> 0) AND
                ((RISKY) OR (List=Altern) OR ((List=Attrib)
                    AND ( ((Pointer MOD 2) = 1) OR (Pointer = 0))));
(* For riskless choice, move two times, unless AtEnd or passing *)
(* by AtEnd. *)

            TraceSTM('GetNext',0,0,0);
            OperationCount[TheNext]:= OperationCount[TheNext] + 1;

            (* For Timed Sim, call Procedure in STMPRIMS to incr counter: *)
            TimeVal := OpWtArr[TheNext];
            Timer(TimeVal);

        END; (* GetNext *)

```

```

PROCEDURE GetPrev;
{(List: MemListType)}
(* Moves back to first previous non-deleted element of list.
Assumes list is not empty. Modified for riskless version. *)

```

```

VAR TimeVal: REAL;

```

```

BEGIN (* GetPrev *)
    WITH MemLists[List] DO
        REPEAT
            Pointer:= (Pointer - 1 + TotContent + 1) MOD (TotContent + 1);
            UNTIL (Contents[Pointer] <> 0) AND
                ((RISKY) OR (List=Altern) OR ((List=Attrib)
                    AND( ((Pointer MOD 2) = 1)
                        OR (Pointer = 0))));

(* For riskless choice move 2 times unless AtEnd or passing by AtEnd. *)

            TraceSTM('GetPrev',0,0,0);
            OperationCount[ThePrev]:= OperationCount[ThePrev] + 1;

            (* For Timed Sim, call Procedure in STMPRIMS to incr counter: *)
            TimeVal := OpWtArr[ThePrev];
            Timer(TimeVal);

        END; (* GetPrev *)

```

```

PROCEDURE SetPoint;
  {(L: MemLoc)}

(* Moves the alternative or attribute in L to the appropriate *)
(* pointer. Saves the current Alt and Att in memory location. *)
(* If the target has been deleted, sets the pointer to the next *)
(* non-empty cell. If all have been deleted, sets it to the *)
(* At-End marker. *)

(* Alt Example. Cycles thru pointers until Contents' pointer equals *)
(* STM[L]'s Alt. However: STM[L]'s Alt could be a number for which *)
(* there's no longer a match in the Contents array, since ELIM can *)
(* set a Contents cell to zero. Looping could be indefinite in search*)
(* of that eliminated value, if not for the "HOLD" processing. Each *)
(* increment to "HOLD" represents a complete cycle thru alts; ie- *)
(* AtEnd(Altern) signals the start of a new cycle through. *)

VAR
  temp: MemCell;
  hold: INTEGER;
  TimeVal: REAL;

BEGIN (* SetPoint *)
  temp.Alt:=CurrValue(Altern);
  temp.Att:= CurrValue(Attrib);

  WITH MemLists[Altern] DO
    BEGIN
      HOLD := 0; (* Kluge to prevent infinite loop if the Target *)
                (* variable has been eliminated. *)
      REPEAT
        IF (AtEnd(Altern)) THEN HOLD := HOLD+1;
        Pointer:=(Pointer + 1) MOD (TotContent + 1);
      UNTIL (Contents[Pointer] = STM[L].Alt)
      OR ((HOLD=2) AND (Contents[Pointer]>STM[L].Alt))
      OR ((HOLD=3) AND (Contents[Pointer]<STM[L].Alt)) (* change*)
      OR ((HOLD>=4) AND (AtEnd(Altern))); (* change*)
    END; (* With *)

  WITH MemLists[Attrib] DO
    BEGIN
      HOLD := 0;
      REPEAT
        IF (AtEnd(Attrib)) THEN HOLD := HOLD+1;
        Pointer:=(Pointer + 1) MOD (TotContent + 1);
      UNTIL (Contents[Pointer] = STM[L].Att)
      OR ((HOLD=2) AND (((Contents[Pointer]>STM[L].Att) and (RISKY))
        OR ((Contents[Pointer]>STM[L].Att) AND
          ODD(Pointer) AND (NOT RISKY))))
      OR ((HOLD>=3) AND AtEnd(Attrib));
    END; (* With *)

  STM[L].Alt:=temp.Alt;
  STM[L].Att:=temp.Att;
  TraceSTM('SetPoint',L,0,0);
  OperationCount[Finger] := OperationCount[Finger] + 1;

  (* For Timed Sim, call Procedure in STMPRIMS to incr counter: *)
  TimeVal := OpWtArr[Finger];

```

```

    Timer(TimeVal);
END; (* SetPoint *)

```

```

PROCEDURE Elim;
  {(List: MemListType)}
  (* Deletes current element from list (eliminates from consideration). *)
  (* Decrements cardinality. See special code for riskless attribs. *)
  (* Note OperationCount increment: separate for alt vs. att. *)

```

```

VAR TimeVal: REAL;

```

```

BEGIN (* Elim *)
  IF AtEnd(List) THEN
    writeln('*** Attempt to delete end-list marker ***')
  ELSE WITH MemLists[List] DO
    BEGIN
      IF (List = Attrib) AND (RISKY = FALSE) THEN
        BEGIN
          Contents[Pointer]:=0;
          NContent:=NContent - 2;
          GetNext(List);
        END
      ELSE BEGIN
          Contents[Pointer]:= 0;
          NContent:= NContent - 1;
          GetNext(List);
        END;
    END; (* WITH *)

    TraceSTM('Elim',0,0,0);
    IF (List=Altern) THEN
      OperationCount[AltAbsence]:=OperationCount[AltAbsence]+1;
    IF (List=Attrib) THEN
      OperationCount[AttAbsence]:=OperationCount[AttAbsence]+1;

    (* For Timed Sim, call Procedure in STMPRIMS to incr counter: *)
    IF (List=Altern) THEN
      TimeVal := OpWtArr[AltAbsence];
    IF (List=Attrib) THEN
      TimeVal := OpWtArr[AttAbsence];
    Timer(TimeVal);

  END; (* Elim *)

```

(\* \* The following routines are for initializing and filling lists. \* \* \* \*)

```

PROCEDURE InitList;
  {(List: MemListType)}
  (* Initializes List to an empty list open for additions. *)

  BEGIN (* InitList *)
    WITH MemLists[List] DO BEGIN
      NContent:= 0;
      Contents[0]:= -1; (* Sentinel for empty list spot. *)
    END;

```

```
END; (* InitList *)
```

```
PROCEDURE PutValue;
```

```
{(List: MemListType; Val: INTEGER)}
```

```
(* Creates a new element at end of List. Assumes AtEnd is true. *)
```

```
BEGIN (* PutValue *)
```

```
  WITH MemLists[List] DO BEGIN
```

```
    Contents[NContent + 1] := Val;
```

```
    NContent := NContent + 1;
```

```
  END;
```

```
END; (* PutValue *)
```

```
PROCEDURE CloseListAdditions;
```

```
{(List: MemListType)}
```

```
(* Initializes List to an empty list open for additions. *)
```

```
BEGIN (* CloseListAdditions *)
```

```
  WITH MemLists[List] DO BEGIN
```

```
    TotContent := NContent;
```

```
    Pointer := 1;
```

```
  END;
```

```
END; (* CloseListAdditions *)
```

```
END. {unit}
```

```
{floatcalls+}
{$list-}
INTERFACE;
UNIT NumPrims (ISwap, IMax, IMin, RMax, RMin);

(* * * * * * * * * * * * * * * * * * * * * * * * * * * * * * * * * *)
(* Primitive number handling routines. *)
(* * * * * * * * * * * * * * * * * * * * * * * * * * * * * * * * * *)

PROCEDURE ISwap(VAR X1,X2: INTEGER);
FUNCTION IMax(X1,X2: INTEGER): INTEGER [PURE];
FUNCTION IMin(X1,X2: INTEGER): INTEGER [PURE];
FUNCTION RMax(X1,X2: REAL): REAL [PURE];
FUNCTION RMin(X1,X2: REAL): REAL [PURE];
END;
{$list+}
```



```

(*****
*) Program: Process                               8/84 *)
*) Input: gamble files from Decide program. Format for *)
*) each set must be 4 alternatives x 3 attributes (3 pay- *)
*) offs and 3 probabilities) with NRuns total sets. *)
*) Output: same payoffs and probabilities, plus calculated*)
*) variance and expected value for each alternative in *)
*) each set, and minimum variance and mean of the variance*)
*) for all the alternatives in each set. Output is *)
*) sorted by the minimum variance of each set, low to hi. *)
(*****

```

```
PROGRAM Process (Input,Output,InData,OutData,NRuns);
```

```
CONST
```

```

    Sp2 = '  ';      (* Output formatting: 2 spaces. *)
    Sp3 = '   ';     (*           3 spaces. *)
    Sp4 = '    ';    (*           4 spaces. *)
    MaxSize = 200;

```

```
TYPE
```

```

    Vector = SUPER ARRAY [1..*] of
        RECORD
            AltXPayProb: ARRAY[1..4, 1..6] of REAL;
            EVArr       : ARRAY[1..4]       of REAL;
            VarArr      : ARRAY[1..4]       of REAL;
            VBar        : REAL;
            VMin        : REAL;
        END;

```

```
GVector = Vector(MaxSize);      (* Handles up to 200 runs. *)
```

```
VAR
```

```

    InData: TEXT;
    OutData: TEXT;
    NRuns: INTEGER;
    GData: GVector;      (* Vector w/200 record-data cells. *)

```

```
(* Input Variables *)
```

```

    NAlternatives, NAttributes, Tran, AltNum: INTEGER;
    Att1, Att2, Att3                          : INTEGER;
    Pay1, Pay2, Pay3                          : REAL;
    Prob1, Prob2, Prob3                       : REAL;

```

```
(* Sort Variables *)
```

```

    TmpArr                                     : ARRAY[1..4] of REAL;
    jmp, m, n                                 : INTEGER;
    tmp, tindex                               : REAL;
    sorted                                     : BOOLEAN;

```

```
(* VMinArr Matrix: *)
```

```

    (* 1st col = initial position in unsorted list *)
    (* 2nd col = VMin of a set of gambles *)
    VMinArr: ARRAY[1..200, 1..2] of REAL;

```

```
(* Index to GData; sorted *)
```

```

    GIndex                                     : INTEGER;
    GRIndex                                    : REAL;

```

```

    i, j, k, l                                 : INTEGER;

```

```

InputCount : INTEGER; (* Count of records read in *)
OutputCount: INTEGER; (* and written out. *)

```

```

BEGIN (* Process *)

```

```

Rewrite(OutData); (* create output file *)
Reset(InData); (* open input file *)

```

```

Writeln (Output, 'Program: Process');
Writeln (Output, ' ');
Writeln (Output, 'Calculating EV, Variance, VBar, VMin...');
Writeln (Output, ' ');

```

```

InputCount := 0;
OutputCount := 0;

```

```

FOR k := 1 to NRuns DO
BEGIN

```

```

    FOR i := 1 to 4 DO
    BEGIN

```

```

        Readln (InData,
                NAlternatives, NAttributes, Tran, AltNum,
                Att1, Pay1, Prob1,
                Att2, Pay2, Prob2,
                Att3, Pay3, Prob3);
        InputCount := InputCount + 1;

```

```

    WITH GData[k] DO (* using GData record fields *)
    BEGIN

```

```

        (* Assign input data to record matrix: *)
        AltXPayProb[i,1] := Pay1;
        AltXPayProb[i,2] := Prob1;
        AltXPayProb[i,3] := Pay2;
        AltXPayProb[i,4] := Prob2;
        AltXPayProb[i,5] := Pay3;
        AltXPayProb[i,6] := Prob3;

```

```

        (* Compute expected value of each alternative *)
        (* in the set: *)
        EVArr[i] := (AltXPayProb[i,1] * AltXPayProb[i,2]) +
                    (AltXPayProb[i,3] * AltXPayProb[i,4]) +
                    (AltXPayProb[i,5] * AltXPayProb[i,6]);

```

```

        (* Compute the variance of ea alt in the set: *)
        VarArr[i] := 1/3 * (sqr(AltXPayProb[i,2]))
                    + 1/3 * (sqr(AltXPayProb[i,4]))
                    + 1/3 * (sqr(AltXPayProb[i,6]))
                    - 2/9 * AltXPayProb[i,2]
                    - 2/9 * AltXPayProb[i,4]
                    - 2/9 * AltXPayProb[i,6]
                    + 1/9;

```

```

    END; (* WITH *)
END; (* FOR; of 4-loop *)

```

```

(* Calculate VBar for the set: *)
WITH GData[k] DO
BEGIN
VBar := (VarArr[1] + VarArr[2] + VarArr[3] + VarArr[4])/4;
END; (* WITH *)

(* Put the values in VarArr into a temporary array *)
(* which will then be sorted: *)
WITH GData[k] DO
BEGIN
For l := 1 to 4 DO
BEGIN
    TmpArr[l] := VarArr[l];
END; (* FOR *)
END; (* WITH *)

(* Find the minimum variance by sorting TmpArr. Shell *)
(* sort from Grogono. *)
jmp := 4; (* 4 values to sort *)
WHILE jmp > 1 DO
BEGIN
    jmp := jmp DIV 2;
    REPEAT
        sorted := TRUE;
        FOR m := 1 to 4 - jmp DO
        BEGIN
            n := m + jmp;
            IF TmpArr[m] > TmpArr[n] THEN
            BEGIN
                tmp := TmpArr[m];
                TmpArr[m] := TmpArr[n];
                TmpArr[n] := tmp;
                sorted := FALSE;
            END; (* IF *)
        END; (* FOR *)
    UNTIL sorted; (* REPEAT *)
END; (* WHILE *)

(* Minimum variance for the set is the 1st element in *)
(* the sorted array. *)
WITH GData[k] DO
BEGIN
    VMin := TmpArr[1];
END; (* WITH *)

(* Set up the pointer array, so it holds both the *)
(* value of k in this loop of NRuns, & the VMin value *)
(* of this set. *)
VMinArr[k,1] := k; (* 1st cell = index value *)
VMinArr[k,2] := TmpArr[1]; (* 2nd cell = min variance *)

END; (* FOR; of NRuns-loop *)

(* Sort VMinArr by VMin, keeping the associated value of k *)
(* with it's VMin value. The k values in the sorted array *)
(* will then be used to output GData in sorted VMin order. *)

jmp := NRuns; (* NRuns values to sort. *)
WHILE jmp > 1 DO

```

```

BEGIN
  jmp := jmp DIV 2;
  REPEAT
    sorted := TRUE;
    FOR m := 1 to NRuns - jmp DO
      BEGIN
        n := m + jmp;
        IF VMinArr[m,2] > VMinArr[n,2] THEN
          BEGIN
            tmp := VMinArr[m,2];          tindex := VMinArr[m,1];
            VMinArr[m,2] := VMinArr[n,2];  VMinArr[m,1] := VMinArr[n,1];
            VMinArr[n,2] := tmp;          VMinArr[n,1] := tindex;
            sorted := FALSE;
          END; (* IF *)
        END; (* FOR *)
      UNTIL sorted; (* REPEAT *)
    END; (* WHILE *)

```

```

Writeln (Output, 'Sort by VMin complete. ');
Writeln (Output, ' ');

```

```

(* VMinArr is a matrix now in sorted order by VMin from *)
(* low to high. Associated w/the value VMin is an in- *)
(* teger indicating the element of the GData array that *)
(* contains the data belonging with VMin. A loop reads *)
(* down this ordered VMinArr from the 1st element to the*)
(* last and retrieves the integer which is used to index*)
(* GData for output. *)

```

```

(* Write headings: *)
Writeln (OutData,
  Sp2, 'Set', Sp4, 'Altern', Sp3,
  Sp3, '$1', Sp3, Sp4, 'P1', Sp2, Sp3,
  Sp3, '$2', Sp3, Sp4, 'P2', Sp2, Sp3,
  Sp3, '$3', Sp3, Sp4, 'P3', Sp4, Sp2,
  Sp3, 'EV', Sp3, Sp2, Sp3, 'V', Sp4,
  ' ', 'VBar', Sp4, 'VMin');
Writeln (OutData, '_____');
Writeln (OutData, '_____');

```

```

Writeln (OutData, Sp4);

```

```

FOR i := 1 to NRuns DO
  BEGIN

```

```

    GRIndex := VMinArr[i,1];          (* Get index as real var.*)
    GIndex  := round(GRIndex);        (* Put into integer var *)
                                          (* w/rounding function. *)

```

```

    WITH GData[GIndex] DO
      BEGIN

```

```

        FOR j := 1 to 4 DO
          BEGIN

```

```

            Writeln
              (OutData, 'Set#', i:3, ' Altern#', j:1, Sp2,
              AltXPayProb[j,1]: 8:2, Sp2,
              AltXPayProb[j,2]: 6:3, Sp3,
              AltXPayProb[j,3]: 8:2, Sp2,

```

```
AltXPayProb[j,4]: 6:3, Sp3,  
AltXPayProb[j,5]: 8:2, Sp2,  
AltXPayProb[j,6]: 6:3, Sp4,
```

```
EVArr[j]: 8:3, Sp2,  
VarArr[j]: 6:3, Sp2,  
VBar: 6:3, Sp2,  
VMin: 6:3);
```

```
END; (* FOR *)
```

```
Writeln (OutData, ' '); (* space a line *)  
OutputCount := OutputCount + 1;
```

```
END; (* WITH *)
```

```
END; (* FOR *)
```

```
Writeln (Output, '# Input Records = ', InputCount);
```

```
Writeln (Output, '# Output Records = ', OutputCount);
```

```
Writeln (Output, ' '); Writeln (Output, 'End Program.');
```

```
END. (* Program *)
```

```

(*****
(* VERSION 1.2                               SIM RISKLESS  *)
(* RANDOM.INT                               6/21/85       *)
(*****

```

```

{$list+}
INTERFACE;
UNIT RANDOM(Ggubs,IntRand,GenProbs,vsrtr,vsrta,IStat,RStat,
            Permuter,Hostile,Dirichlet,Ggnml,Ggnms,MakeSig,
            Ggums,URand);
USES Sim;

```

```

(* * * * * * * * * * * * * * * * * * * * * * * * * * * * * * * * * *)
(* random number generation and sorting.                               *)
(* * * * * * * * * * * * * * * * * * * * * * * * * * * * * * * * * *)

```

```

PROCEDURE Ggubs(VAR Seed: INTEGER4; nrand: INTEGER; VAR randnum: Vector);
FUNCTION IntRand(Bot, Top: INTEGER): INTEGER;
PROCEDURE GenProbs(VAR RVs: Vector; nRV: INTEGER);
PROCEDURE vsrtr (VAR a: Vector; la: INTEGER; VAR ir: Map);
PROCEDURE vsrta (VAR A: Vector; la: INTEGER);
PROCEDURE IStat (CONST A: Map; CONST n: INTEGER; VAR Mean, StdDev: REAL);
PROCEDURE RStat (CONST A: Vector; CONST n: INTEGER; VAR Mean, StdDev: REAL);
PROCEDURE Permuter(VAR NumRV: INTEGER; VAR RValues: Vector);
PROCEDURE Hostile(VAR RVs: Vector; nRV: INTEGER);
(* Added 10/84: *)
PROCEDURE Dirichlet (VAR RVs: Vector; nRV: INTEGER);
(* Added 6/85. Sanjoy Ghose's translation of certain IMSL random *)
(* number routines: *)
PROCEDURE Ggnml (VAR Seed:INTEGER4; nrand:INTEGER; VAR Arr1:VECTOR);
(* Normal deviate random number generator. *)
PROCEDURE Ggnms (VAR x:VTable; NCAlt,NCAtt:INTEGER; ArrSig:VTable);
(* Produces normal variates with a given variance-covariance matrix. *)
PROCEDURE MakeSig;
(* Generates a variance-covariance matrix for GGNMS; modified 6/85. *)
PROCEDURE Ggums (VAR X:VTable; NCAlt,NCAtt:INTEGER; ArrSig:VTable);
(* Translates the normals into a uniform, but which probably generates *)
(* some ties in the process. *)
FUNCTION URand (VAR Seed: Integer4): Real;

```

END;

```
(*****
(* VERSION 1.2                               SIM RISKLESS *)
(* RANDOM.PAS                               11/19/85   *)
*****)
```

```
{ $INCLUDE: 'sim.int' }
{ $INCLUDE: 'random.int' }
IMPLEMENTATION OF RANDOM;
USES SIM;
```

```
(* * * * *
(* random number generation and sorting. *)
(* * * * * *)
```

```
PROCEDURE Ggubs;
{This is a PASCAL implementation of the Schrage portable random
number generator}
```

```
Const      a = 16807;
           b15 = 32768;
           b16 = 65536;
           p = 2147483647;
           sdiv = 4.656612875e-10;
```

```
Var        xhi, xalo, leftlo, fhi, k : integer4;
           i: INTEGER;
```

```
BEGIN (* Ggubs *)
  FOR i := 1 TO nrand DO
    BEGIN
      xhi := seed div b16;
      xalo := (seed - xhi * b16) * a;
      leftlo := xalo div b16;
      fhi := xhi * a + leftlo;
      k := fhi div b15;
      seed := ((xalo - leftlo * b16) - p) + (fhi - k * b15) * b16 +
      if seed < 0 then seed := seed + p;
      randnum[i] := float4(seed) * sdiv;
    END
  END; (* Ggubs *)
```

```
FUNCTION IntRand;
```

```
VAR RealTemp: AttVec;
                                (* Holds the temp. real # between 0 and 1 *)
    Int: INTEGER;

BEGIN (* IntRand *)

  Int:=12;
  Ggubs(DSeed,Int,RealTemp);

  IntRand:= TRUNC((Top - Bot + 1) * RealTemp[1]) + Bot;

  (* 0 <= RealTemp[1] < 1 ==> 0 <= trunc() < Top - Bot + 1 ==>
```

```
Bot <= IntRand < Top + 1 ==> Bot <= IntRand <= Top *)
```

```
END; (* IntRand *)
```

```
PROCEDURE GenProbs;
```

```
(* Generates nRV uniform[0,1] random variables which are normalized to sum to 1, but are otherwise independent & uniform. Method used by Thorngate. See Johnson and Payne Appendix B for it properties. *)
```

```
VAR Sum: REAL;  
I: INTEGER;
```

```
BEGIN (* GenProbs *)
```

```
(* Get all variables unif(0,1) *)
```

```
I:= 12;
```

```
Ggubs(DSeed,I,RVs);
```

```
(* Get the sum of the uniform variables. *)
```

```
Sum:= 0;
```

```
FOR I:= 1 TO nRV DO
```

```
Sum:= Sum + RVs[I];
```

```
(* Normalize the variables. *)
```

```
FOR I:= 1 TO nRV DO
```

```
RVs[I]:= RVs[I] / Sum;
```

```
END; (* GenProbs *)
```

```
PROCEDURE vsrtr;
```

```
(* Shell sort adapted from Grogono *)
```

```
{Functions identically to the IMSL routine of the same name}
```

```
VAR
```

```
jmp, m, n, tindex: INTEGER;
```

```
tmp: REAL;
```

```
sorted: BOOLEAN;
```

```
BEGIN (* vsrtr *)
```

```
jmp := la;
```

```
WHILE jmp > 1 DO
```

```
BEGIN
```

```
jmp := jmp DIV 2;
```

```
REPEAT
```

```
sorted := TRUE;
```

```
FOR m := 1 TO la - jmp DO
```

```
BEGIN
```

```
n := m + jmp;
```

```
IF A[m] > A[n] THEN
```

```
BEGIN
```

```
tmp := A[m]; tindex := ir[m];
```

```
A[m] := A[n]; ir[m] := ir[n];
```

```
A[n] := tmp; ir[n] := tindex;
```

```
sorted := FALSE
```

```
END
```

```
END (* FOR *)
```

```
UNTIL sorted
```

```
END (* WHILE *)
```

```
END; (* vsrtr *)
```

```
PROCEDURE vsrta;  
(* Shell sort adapted from Grogono *)  
{Identical to IMSL routine of the same name}
```

```
VAR
```

```
  jmp, m, n: INTEGER;  
  tmp: REAL;  
  sorted: BOOLEAN;
```

```
BEGIN (* vsrta *)
```

```
  jmp := la;
```

```
  WHILE jmp > 1 DO
```

```
    BEGIN
```

```
      jmp := jmp DIV 2;
```

```
      REPEAT
```

```
        sorted := TRUE;
```

```
        FOR m := 1 TO la - jmp DO
```

```
          BEGIN
```

```
            n := m + jmp;
```

```
            IF A[m] > A[n] THEN
```

```
              BEGIN
```

```
                tmp := A[m];
```

```
                A[m] := A[n];
```

```
                A[n] := tmp;
```

```
                sorted := FALSE
```

```
              END
```

```
            END (* FOR *)
```

```
          UNTIL sorted
```

```
        END (* WHILE *)
```

```
END; (* vsrta *)
```

```
PROCEDURE IStat;
```

```
{Subroutine which calculates the means and StdDev of an integer vector  
A, of length n}
```

```
VAR    J: INTEGER;
```

```
BEGIN (* IStat *)
```

```
  FOR J := 1 TO n DO
```

```
    BEGIN
```

```
      Mean := Mean + A[J];
```

```
      StdDev := StdDev + SQR (A[J])
```

```
    END;
```

```
  If (I = NRun) Then
```

```
    BEGIN
```

```
      StdDev := SQRT ((StdDev - SQR (Mean) / n) / (n - 1));
```

```
      Mean := Mean / n;
```

```
    End;
```

```
END; (* IStat *)
```

```

PROCEDURE RStat;
{Calculates the Mean and StdDev of REAL vector A of length n}
  VAR      J: INTEGER;

  BEGIN (* RStat *)

    FOR J := 1 TO n DO
      BEGIN
        Mean := Mean + A[J];
        StdDev := StdDev + SQR (A[J])
      END;

    If (I = NRun) Then
      BEGIN
        StdDev := SQR ((StdDev - SQR (Mean) / n) / (n - 1));
        Mean := Mean / n;
      END;

  END; (* RStat *)

```

```

PROCEDURE Permuter;
(* (VAR NumRV:INTEGER; VAR RValues:VECTOR); *)
(* Called from InitProbabilities in START.PAS. Procedure to create an*)
(* array used for a random assignment of hostile environment probs to *)
(* the array of attributes. More generally, a routine which simply *)
(* permutes RValues. *)

  VAR RandArray: AttMap;
      TempReal: AttVec;
      J : INTEGER;

  BEGIN (* Permuter *)
    FOR J := 1 TO NumRV DO
      RandArray[J] := J;

      (*These are "imsl" routines that generate randoms & sort arrays*)
      J:=12;
      Ggubs(DSeed,J,TempReal);
      vsrtr(TempReal,NumRV,RandArray);

    FOR J:= 1 TO NumRV DO
      TempReal[J]:=RValues[RandArray[J]];

    FOR J:= 1 TO NumRV DO
      Rvalues[J]:=TempReal[J];

  END; (* Permuter *)

```

```

PROCEDURE Hostile;
(* VAR RVs:VECTOR; nRV:INTEGER); *)
(* Called from InitProbabilities in START.PAS. *)
(* The high variance equivalent to GenProbs. Returns in RVs a *)
(* vector of length nRVs, a high variance set of probabilities.*)

  VAR sum: REAL;
      J,AttNum: INTEGER;

```

```
AttRand: AttMap;
Transform: AttVec;
```

```
BEGIN (* Hostile *)
  sum:= 0;
  J:=12;
  Ggubs(DSeed,J,RVs);
  FOR J:=1 TO (nRV - 1) DO BEGIN
    Transform[J]:=(1.0 - sum) * RVs[J];
    sum:=sum + Transform[J];
  END; (* FOR *)
  Transform[nRV]:=1.0 - sum;

  Permuter(nRV,Transform);

  FOR J:=1 TO nRV DO
    RVs[J]:=Transform[J];
END; (* Hostile *)
```

```
PROCEDURE Dirichlet;
(* VAR RVs:Vector; nRV:INTEGER *)
(* Added 10/84. Called from InitProbabilities in START.PAS. *)
```

```
VAR
  NRand: INTEGER; (* Number of random numbers. *)
  CalcArr: Array[0..10] of REAL; (* Intermed. array. Zero/one *)
  FullArr: Array[0..10] of REAL; (* set as lower/upper limits. *)
  II : INTEGER; (* Contains weights after calc. *)
  RandNum: AttVec; (* w/zero/one low/up limits. *)
  (* Looping index. *)
  (* Array passed to Ggubs. *)
  (* Array[1..12] of REAL;VECTOR. *)
```

```
BEGIN (* Dirichlet *)

  NRand := nRV - 1; (* Establish number of rand #s. *)
  Ggubs(DSeed, NRand, RandNum); (* Generate random numbers. *)
  VsrtA(RandNum, NRand); (* Sort them low to high. *)

  (* Define lower & upper limits of an array and put sorted *)
  (* RandNum array into this array: *)
  CalcArr[0] := 0;
  CalcArr[nRV] := 1;
  FOR II := 1 to NRand DO
    CalcArr[II] := RandNum[II];

  (* Calculate weights: set up array FullArr w/zero and one as *)
  (* lower and upper limits. Then calculate weights using ran- *)
  (* dom numbers in CalcArr and put results into FullArr. *)
  FullArr[0] := 0;
  FullArr[nRV] := 1;
  FOR II := 1 to nRV DO
    FullArr[II] := CalcArr[II] - CalcArr[II-1];

  (* Transfer nRV number of weights (NAttributes) in FullArr *)
  (* to the array RVs (ie, TempValues, for later transfer to *)
  (* array Values). *)
  FOR II := 1 to nRV DO
    RVs[II] := FullArr[II];
```

```
END; (* Dirichlet *)
```

```
Procedure GGNML;  
{ (var seed:integer4;nrand:integer;VAR ARR1:AttVec) }
```

```
VAR  
    Temp1,Temp2,Temp3,Temp4 : Real;  
    Us:AttVec;  
    I:INTEGER;
```

```
BEGIN (*GGNML*)  
    I:=1;
```

```
    WHILE I<=NRAND DO  
        BEGIN
```

```
            BEGIN  
                Temp1:=urand(dseed) ;  
                Temp2 := sqrt(-2.0 *  
                    ln(Temp1));  
                Temp3:=urand(dseed);  
                temp4 := 6.2831853 * Temp3;  
                ARR1[I] := temp2 * cos(temp4);  
            END;
```

```
            IF (I+1)<=NRAND THEN  
                BEGIN  
                    ARR1[I+1] := temp2 * sin(temp4);  
                END;
```

```
            I:=I+2;
```

```
        END
```

```
    END; (*GGNML*)
```

```
PROCEDURE GGNMS;  
{(VAR X:Vtable;NCAlt,NCAtt:INTEGER;VAR ARRSIG:Vtable);}
```

```
VAR
```

```
    k1,k,j,i,k2,j1,j2,J3:INTEGER;  
    ck,sum,sum1:REAL;  
    sum2,arr1:AttVec;  
    arrc:Vtable;
```

```
BEGIN(*GGNMS*)
```

```
    FOR j3:=1 to NCAlt DO
```

```
    FOR J1:=1 TO NCAtt DO
```

```
        BEGIN(*FOR*)
```

```
            x[j3,J1]:=0.0
```

```
        END;(*FOR*)
```

```
            FOR j1:=1 to NCAtt DO
```

```
            FOR j2:=1 to NCAtt DO
```

```

BEGIN(*FOR*)
  arrc[j1,j2]:=0.0
END;(*FOR*)

```

```

FOR i:=1 to NCAtt DO
  BEGIN(*FOR*)
    arrc[i,1]:=arrsig[i,1]/SQRT(arrsig[1,1])
  END;(*FOR*)

```

```

FOR i:=2 to NCAtt DO(*LINE 10, FORTRAN*)
  BEGIN(*FOR*)
    sum:=0.0;
    k1:=i-1;
    FOR k:=1 to k1 DO(*LINE 13, FORTRAN*)
      BEGIN(*FOR*)
        sum:=sum+arrc[i,k]*arrc[i,k]
      END;(*FOR,LINE 13, FORTRAN*)
    ck:=arrsig[i,i]-sum;
    IF ck<0.0
      THEN WRITE(output,'STOP CALCULATIONS')
      ELSE arrc[i,i]:=SQRT(ck);
  END;(*FOR*)

```

```

IF i<NCAtt
  THEN
    BEGIN(*THEN*)
      k1:=i;
      FOR j:=2 to k1 DO (*LINE21,FORTRAN*)
        BEGIN(*FOR*)
          sum1:=0.0;
          k2:=j-1;
          FOR k:=1 to k2 DO (*LINE 24,FORTRAN*)
            BEGIN(*FOR*)
              sum1:=sum1+arrc[i+1,k] * arrc[j,k]
            END;(*FOR*)
            arrc[i+1,j]:=(arrsig[i+1,j]-sum1)/arrc[j,j]
          END;(*FOR,LINE 21,FORTRAN*)
        END;(*THEN*)
      END;(*FOR,LINE 10*)

```

```

FOR J3 := 1 to NCAIt DO
  BEGIN {FOR}
    FOR i:= 1 to NCAtt DO
      Sum2[i] := 0;
      GGNML(Dseed,NCAtt,arr1);

      FOR i:= 1 TO NCAtt DO
        FOR j := 1 to NCAtt DO
          sum2[i] := sum2[i] + arrc[i,j] * arr1[j]

        For i := 1 to NCAtt DO
          x[j3,i] := sum2 [i];

```

```

END; (*FOR J3*)

```

```

END;(*GGNMS*)

```

```

PROCEDURE MakeSig;
VAR      i,j      :Integer;
         direction: real;
         Equal: Boolean;

BEGIN  (* MakeSig.  Mod. 6/85 to answer "Are covariances equal?" and *)
      (* "If yes, give correlation; if no, name input file for      *)
      (* values" -- ie, SigFile -- via input in program header.    *)

      IF CVEq = TRUE THEN      (* CVEq = Are CoVariances equal? *)
        Direction := Corr;      (* Corr = correlation.      *)
      IF CVEq = FALSE THEN
        Reset (SigFile);      (* Open input file of sigma values.*)

      i := 1; j := 1;
      WHILE i <= NAttributes DO
      BEGIN

        j := 1;
        WHILE j <= NAttributes DO
        BEGIN
          IF CVEq THEN
            BEGIN      (* Covariances are equal. *)
              IF i<>j
              THEN
                sigma[i,j]:=Direction
              ELSE
                sigma[i,j]:= 1.0;
              j:=j+1;

            END
          ELSE
            BEGIN      (* Covariances are unequal.      *)
              (* Fills upper diagonal half of sigma matrix from external file. *)
              IF (i=j) THEN
                sigma[i,j]:=1.0;
              IF (i>j) THEN
                REPEAT      (* until *)
                  IF (i=j) THEN
                    sigma[i,j]:=1.0;
                    j:=j+1;
                  UNTIL (j>i);      (* repeat loop *)
              IF (i<>j) AND (j <= NAttributes) THEN
                BEGIN
                  Read(SigFile, sigvalue);
                  sigma[i,j]:=sigvalue;
                END;
                j:=j+1;

            END;      (* ELSE *)

        END;      (* While j DO *)

        i:=i+1;
      END;      (* While i DO *)

```

```

IF CVEq = FALSE THEN
BEGIN
  Close (SigFile);
(* Fill in lower half of sigma w/matching values: *)
  For j:=1 to (NAttributes - 1) DO
    For i:= 2 to NAttributes DO
      sigma[i,j]:=sigma[j,i];
END;

(* Test code: eliminate after testing...prints out matrix. *)
FOR i:=1 to NAttributes DO
  FOR j:=1 to NAttributes DO
    BEGIN
      Writeln(output, 'Sigma ',i,j,' = ',sigma[i,j]);
    END;
  (*****)
END;      {MakeSig}

```

```

PROCEDURE GGUMS;
  ((VAR X:VTable;NCAlt,NCatt:INTEGER;VAR ARRSIG:VTable);)

```

{Segments the normal variates produced by a call to GGNMS to produce a series of 0,1 uniforms with the same correlation. It does this by taking the normals and sorting them into one of a set of bins, and then doing a (hopefully) appropriate division that would make sure the normals fall in the bin.}

```

LABEL 1;

```

```

VAR I,J :INTEGER;
Sign    :BOOLEAN;
y       :Vtable;

```

```

BEGIN {ggums}

```

```

GGNMS(X,NCAlt,NCatt,ARRSIG);

```

```

FOR i:= 1 to NCAlt DO
FOR j:= 1 to NCatt DO
  BEGIN(*FOR*)
    IF (X[I,J] < 0.0) THEN
      BEGIN
        x[i,j] := x[i,j] * (-1.0);
        Sign := true;
      END
    ELSE Sign := FALSE;

```

```

    IF (x[i,j] < 0.1) THEN
  BEGIN
    y[i,j] := 0.5;
    GOTO 1;
  END;

```

```

    IF (x[i,j] < 0.2) THEN
  BEGIN
    y[i,j] := 0.5398 ;
    GOTO 1;
  END;

```

```

END;

```

```
      IF (x[i,j] < 0.3) THEN
BEGIN
  y[i,j] := 0.5793 ;
  GOTO 1;
END;
      IF (x[i,j] < 0.4) THEN
BEGIN
  y[i,j] := 0.6179 ;
  GOTO 1;
END;
      IF (x[i,j] < 0.5) THEN
BEGIN
  y[i,j] := 0.6554 ;
  GOTO 1;
END;
      IF (x[i,j] < 0.6) THEN
BEGIN
  y[i,j] := 0.6915 ;
  GOTO 1;
END;
      IF (x[i,j] < 0.7) THEN
BEGIN
  y[i,j] := 0.7257 ;
  GOTO 1;
END;
      IF (x[i,j] < 0.8) THEN
BEGIN
  y[i,j] := 0.7580 ;
  GOTO 1;
END;
      IF (x[i,j] < 0.9) THEN
BEGIN
  y[i,j] := 0.7881 ;
  GOTO 1;
END;
      IF (x[i,j] < 1.0) THEN
BEGIN
  y[i,j] := 0.8159 ;
  GOTO 1;
END;
      IF (x[i,j] < 1.1) THEN
BEGIN
  y[i,j] := 0.8413 ;
  GOTO 1;
END;
      IF (x[i,j] < 1.2) THEN
BEGIN
  y[i,j] := 0.8643 ;
  GOTO 1;
END;
      IF (x[i,j] < 1.3) THEN
BEGIN
  y[i,j] := 0.8849 ;
  GOTO 1;
END;
      IF (x[i,j] < 1.4) THEN
BEGIN
  y[i,j] := 0.9032 ;
  GOTO 1;
END;
```

```
      IF (x[i,j] < 1.5) THEN
BEGIN
  y[i,j] := 0.9192 ;
  GOTO 1;
END;
      IF (x[i,j] < 1.6) THEN
BEGIN
  y[i,j] := 0.9332 ;
  GOTO 1;
END;
      IF (x[i,j] < 1.7) THEN
BEGIN
  y[i,j] := 0.9452 ;
  GOTO 1;
END;
      IF (x[i,j] < 1.8) THEN
BEGIN
  y[i,j] := 0.9554 ;
  GOTO 1;
END;
      IF (x[i,j] < 1.9) THEN
BEGIN
  y[i,j] := 0.9641 ;
  GOTO 1;
END;
      IF (x[i,j] < 2.0) THEN
BEGIN
  y[i,j] := 0.9713 ;
  GOTO 1;
END;
      IF (x[i,j] < 2.1) THEN
BEGIN
  y[i,j] := 0.9772 ;
  GOTO 1;
END;
      IF (x[i,j] < 2.2) THEN
BEGIN
  y[i,j] := 0.9821 ;
  GOTO 1;
END;
      IF (x[i,j] < 2.3) THEN
BEGIN
  y[i,j] := 0.9861 ;
  GOTO 1;
END;
      IF (x[i,j] < 2.4) THEN
BEGIN
  y[i,j] := 0.9893 ;
  GOTO 1;
END;
      IF (x[i,j] < 2.5) THEN
BEGIN
  y[i,j] := 0.9918 ;
  GOTO 1;
END;
      IF (x[i,j] < 2.6) THEN
BEGIN
  y[i,j] := 0.9938 ;
  GOTO 1;
END;
```

```

        IF (x[i,j] < 2.7) THEN
BEGIN
  Y[i,j] := 0.9953 ;
  GOTO 1;
END;
        IF (x[i,j] < 2.8) THEN
BEGIN
  Y[i,j] := 0.9965 ;
  GOTO 1;
END;
        IF (x[i,j] < 2.9) THEN
BEGIN
  Y[i,j] := 0.9974 ;
  GOTO 1;
END;
        IF (x[i,j] < 3.0) THEN
BEGIN
  Y[i,j] := 0.9981 ;
  GOTO 1;
END;
        IF (x[i,j] < 3.1) THEN
BEGIN
  Y[i,j] := 0.9987 ;
  GOTO 1;
END;
        IF (x[i,j] < 3.2) THEN
BEGIN
  Y[i,j] := 0.9987 ;
  GOTO 1;
END;
        IF (x[i,j] < 3.3) THEN
BEGIN
  Y[i,j] := 0.9987 ;
  GOTO 1;
END;
        IF (x[i,j] < 3.4) THEN
BEGIN
  Y[i,j] := 0.9988 ;
  GOTO 1;
END;
        IF (x[i,j] < 3.5) THEN
BEGIN
  Y[i,j] := 0.9988 ;
  GOTO 1;
END;
        IF (x[i,j] >= 3.5) THEN
  Y[i,j] := 0.9989;
1:      IF sign THEN x[i,j] := 0.5 - (y[i,j] - 0.5)
        ELSE x[i,j] := y[i,j]          {reverses for neg. numbers}

        END;(*FOR*)
END; {ggums}

FUNCTION URand;
(* VAR Seed:Integer4 *)

VAR

```

Rands: AttVec;

BEGIN

Ggubs(Seed,1,Rands);

URand:=Rands[1];

END; (\* URand \*)

END. {Unit}

```
{Interface for SCREENVV, Screen handler routines for TOOLS      }
{Version 2.0 (C)Copyright Blaise Computing, Inc. 1982          }
```

```
interface; unit screenvv(adaptvv,resetvv,modevv,actpagvv,pagsetvv,
                        pagposvv,scrollvv,clsvv,locvv,cursetvv,
                        curposvv,attribvv,cursorvv,readvv,
                        writevv,scnwrtvv);
```

```
var
  adaptvv : boolean;          ! True if color/graphics adapter used.
```

```
procedure resetvv (mode : byte);
procedure modevv (var mode,columns,cur_apage : byte);
procedure actpagvv(apage : byte);
procedure pagsetvv(cpage : byte);
procedure pagposvv(var cpage : byte);
procedure scrollvv(no_lines,attrib,upper_row,upper_col,
                 lower_row,lower_col,code : byte);
procedure clsvv;
procedure locvv (var row,col : byte; code : byte);
procedure cursetvv(row,col : byte);
procedure curposvv(var row,col : byte);
procedure attribvv(foreground,background : byte; ch : char;
                  no_chars : word);
procedure cursorvv(on_off,high,low : byte);
procedure readvv (var ch : char; var foreat,backat : byte);
procedure writevv (ch : char; no_chars : word);
procedure scnwrtvv(ch : char; fore : byte);
```

```
begin
end;
```

```
{floatcalls+}
{linesize:130}
```

```
(*****
(* VERSION 1.2                                TIMED RISKLESS SIM      *)
(* SIM.INT                                    11/12/85                *)
(*****
(*      - 2 vars added to pgm header: CutOffValue and      *)
(* DIST, to specify cutoff for gamble value (was 500)      *)
(* and distribution (was 1000). Added also to SIM.PAS      *)
(* and changes made to START's Initialize and InitValues. *)
(* 6/6/85 - SIM divided into risky & riskless versions.   *)
(* Risky no longer input by user, but var assigned in     *)
(* Decide. Special set of rules for Riskless version.     *)
(* Pgm header FmtPrt added to edit or condense output.   *)
(* JPIndex variables added for calc in Sim.Pas.           *)
(* XLimit - Problem ...some kind of strange overflow?    *)
(* Dummy var added to attempt to circumvent.              *)
(* 9/27/85 - Untimed AU rule performed automatically to   *)
(* provide baseline data for JPIndex calc. Timed AU rule *)
(* renamed TimedAU; added to rules. No output generated  *)
(* for untimed AU rule; values simply used for JPIndex.  *)
(*****)
```

INTERFACE;

```
UNIT Sim (NMemCell,MaxAttributes,TwoXMaxAttributes,MaxAlternatives,MaxList,
  Combined,CutOffVal,OperResults,
  Empty,Minimum,Maximum,Difference,Sum,Product,
  Quotient,Momento,Blood,Squint,Oversight,TheNext,ThePrev,
  Finger,AltAbsence,AttAbsence,MemLoc,MemCell,
  MemListType,Altern,Attrib,
  MemListRecord,
  Vector,Map,AttVec,AttMap,
  TwoXAttVec,Vtable,AltVec,AltMap,CombVec,

  Risky,

  Rules,
  Rand,AddUtility,TimedAU,EBA,LexiSemi,
  Lexi,EqualWeight,MCD,EBAEU,
  EBAMCD,Satisficing,
  Rule,Used,MeanData,StdData,

  O,Mean,StdDev,STM,Values,CutOffs,DomValues,
  ChoiceUtils,ChoiceValues,ChoiceUProp,ChoiceProp,ChoicePro2,
  ChoiceIndex,ChoiceRanking,ChoiceURank,MemLists,AltAU,UAltAU,AltRand,
  NRep,Noise,

  Time,TimeUp,OpWtArr,

  AADummy,AdULimit,EBALimit,LexLimit,
  LxLimit,EqWLimit,MCDLimit,EEULimit,
  ECDLimit,SatLimit,

  EBARulCnt,EBARndCnt,
  SatRulCnt,SatRndCnt,LSORulCnt,LSORndCnt,MCDTieCnt,
  JPIdx,MCVArr,

  Sigma,SigmaX,SigValue,
```



```
include Momento for Remembers, Blood for GetCut,  
Finger for SetPoint, and Oversight for Forget*)
```

```
OperResults = (Empty,Minimum,Maximum,Difference,Sum,Product,  
              Quotient,Momento,Blood,Squint,Oversight,TheNext,ThePrev,  
              Finger,AltAbsence,AttAbsence);
```

```
MemLoc = 0..NMemCell; {0 is a special 'non-existent' memory cell  
                      used by TraceSTM}
```

```
MemCell = RECORD (* One "element" of decision maker's memory. *)
```

```
  (* Operation which created this cell *)
```

```
  OpType: OperResults;
```

```
  (* Attribute under consideration *)
```

```
  Att: -1..TwoXMaxAttributes;
```

```
  (* The alternative or cutoff we are remembering *)
```

```
  Alt: CutOffVal..MaxAlternatives;
```

```
  (* The value of this alternative in this att *)
```

```
  AValue: REAL;
```

```
END;
```

```
(* * * * * Types of the memory number lists * * * * *)
```

```
MemListType = (Altern,Attrib); (* Kinds of lists *)
```

```
MemListRecord = RECORD
```

```
  Contents: ARRAY[0..MaxList] OF INTEGER;
```

```
  TotContent,NContent,Pointer: INTEGER;
```

```
END;
```

```
(* * * * * Types for keeping and passing program information * * * *)
```

```
Vector = SUPER ARRAY[1..*] OF REAL;
```

```
Map = SUPER ARRAY[1..*] OF INTEGER;
```

```
AttVec = Vector (MaxAttributes);
```

```
AttMap = Map (MaxAttributes);
```

```
TwoXAttVec = Vector (TwoXMaxAttributes);
```

```
VTable = ARRAY [1..MaxAlternatives] of TwoXAttVec;
```

```
AltVec = Vector (MaxAlternatives);
```

```
AltMap = Map (MaxAlternatives);
```

```
CombVec = Vector (Combined);
```

```
Rules = (Rand,AddUtility,TimedAU,EBA,LexiSemi,Lexi,
```

```
        EqualWeight,MCD,EBAEU,EBAMCD,Satisficing);
```

```
DecChoiceArr = ARRAY[1..10] of INTEGER; (* Type to hold first *)
```

```
(* 10 alts chosen for ea. rule. For debugging, w/hdr var WinsOut.*)
```

VAR

```
Risky: BOOLEAN; (* 1 = True, Risky. 2 = False, Not Risky. *)
(* Value not risky assigned in Decide for this version of *)
(* SIM. In risky choice, each attribute has an indepen- *)
(* dent probability; for riskless choice, probabilities *)
(* are equivalent to importance weights and all the al- *)
(* ternatives have the same weight for a given attribute. *)
JPIdx: REAL; (* Calculated for any rule other than Rand. *)
(* In timed sim, timed AU rule is renamed TimedAU; original*)
(* AU rule run automatically to provide value for calc. *)
MCVArr: ARRAY[1..3] of REAL; (* Used for JPIndex calculation. *)

Sigma: VTable; (* Covariance array for correlated attributes. *)
SigmaX:VTable; (* Another covar array for correlated attributes. *)
Sigvalue:REAL; (* Input value read in from Sigfile for MakeSig *)
(* in Random.Pas. Used to implement correlated *)
(* attribute value generation. *)

(* For Timed Sim: *)

(* Array to hold count to compare against TimeLimit for each run *)
(* of each rule. Initialized before each run in Procedure DoARule*)
(* in file Decrules. *)
Time: Array[Rules] of REAL;
TimeUp: BOOLEAN; (* Throws rule into random choice at time limit. *)
OpWtArr: Array[OperResults] of REAL; (* Holds weight values for *)
(* the operations used by the rules. Values read into array in *)
(* SIM.PAS from WtsFile, a file supplied by user. *)

(* Vars contain number of times a rule reaches the time limit; *)
(* values incremented in Decrules and passed to SIM.PAS to output:*)
AAADummy: INTEGER; (* Attempt to circumvent overflow problem.(?) *)
EqWLimit,MCDLimit,EEULimit,ECDLimit: INTEGER;
AdULimit,EBALimit,LexLimit,SatLimit: INTEGER;
LxLimit: INTEGER;

BestChoice: ARRAY[Rules] of INTEGER; (* Holds a counter of # best *)
(* choices made by a rule. Incremented in Decrules; *)
(* initialized in Sim.Pas. *)
Proportion: REAL; (* A cell of BestChoice divided by the number *)
(* of runs, and output in Sim.Pas to TraceOut. *)

(* Vars to hold counters for certain Rules. Ex:keep track of *)
(* # times a decision was reached by rule vs. at random. *)
EBARulCnt,EBARndCnt: INTEGER; (* EBA *)
SatRulCnt,SatRndCnt: INTEGER; (* Satisficing *)
LSORulCnt,LSORndCnt: INTEGER; (* LexiSemi *)
MCDTieCnt: INTEGER; (* Majority Confirming Dimen's *)

AdUDec,EBADec,LexDec,LxDec : DecChoiceArr; (* One array for ea *)
EqWDec,MCDDec,EEUDec,ECDDec: DecChoiceArr; (* rule, to hold 1st *)
SatDec: DecChoiceArr; (* 10 alts chosen. Used*)
(* with pgm header "WinsOut", for debugging. *)

Rule: Rules;
O: OperResults;
Used: ARRAY[Rules] of BOOLEAN; (* remember which rules used. *)
```

(\* Raw data collection arrays \*)

```
StdData: ARRAY[Rules] of
  RECORD
    DomValues:      Real;
    DomExist:       Real;
    ChoiceValues:   Real;
    ChoiceRanking:  Real;
    ChoiceUtils:    Real;
    ChoiceURank:    Real;
    OperationCount: ARRAY[OperResults] of Real;
```

END;

```
MeanData: ARRAY[Rules] of
  RECORD
    DomValues:      Real;
    DomExist:       Real;
    ChoiceValues:   Real;
    ChoiceRanking:  Real;
    ChoiceUtils:    Real;
    ChoiceURank:    Real;
    OperationCount: ARRAY[OperResults] of Real;
```

END;

Mean, StdDev: REAL;

STM: ARRAY[1..NMemCell] of MemCell; (\* STM = simulated Short Term Memory \*)

(\* For each alternative, the attribute values on the left, and \*)  
(\* the corresponding attribute probabilities on the right. \*)  
Values: VTable;

CutOffs: TwoXAttVec; (\* Lowest att. value allowed, for some rules \*)  
DomValues: AltVec; (\* 0 if not dominated; The value of the  
dominating alternative otherwise \*)  
ChoiceUtils: AltVec; (\* the utilities of each alternative \*)  
ChoiceValues: AltVec; (\* The Additive Utility value for an altern. \*)  
ChoiceUProp: AltVec; (\* the utilities of each alternative in comparison  
to Au \*)  
ChoiceProp: AltVec; (\* The Proportion of EV in comparison to AU \*)  
ChoicePro2: AltVec; (\* The Proportion of EV in comparison to AU  
using a squared loss function. \*)  
ChoiceIndex: AltVec; (\* The Proportion of the difference of the  
AU rule and the random choice. \*)  
ChoiceRanking: AltMap; (\* The ordering of the choices. \*)  
ChoiceURank: AltMap; (\* The ordering using utility. \*)

MemLists: ARRAY[MemListType] of MemListRecord;

AltAU: INTEGER; (\* Index of the AU rank. \*)  
UAltAU: INTEGER; (\* Index of the AU rank. \*)  
AltRand: INTEGER; (\* Index of the Random choice rank. \*)

i, j, k, l, m: INTEGER; (\* Indices used w/WinsOut pgm hdr. \*)  
n, p, q, r, s: INTEGER; (\* 0 defined elsewhere; used w/opcts. \*)

NRep: INTEGER; (\* Number of replications. Unused. \*)



```
(* a. Enter 0 to disable the option and allow a      *)
(* matrix of up to 8 x 8.                            *)
(* b. Enter an integer > 0 to specify the number of *)
(* dominated alternatives to be in each set of       *)
(* gambles generated. Requires a 4 x 3 matrix.      *)
```

```
CVEq: BOOLEAN; (* 0=FALSE; 1=TRUE. If PG indicates Correlated *)
(* Attributes are to be used to generate payoffs, *)
(* CVEq indicates equality or nonequality of CV. *)
Corr: REAL;    (* If CVEq is TRUE, give the correlation desired. *)
JND: REAL;    (* Just Noticeable Difference value. Used in *)
(* riskless Lexisemi rule. *)
```

```
DSeed: INTEGER4; (* RV seed *)
Dist: REAL;      (* Entering a value of zero will give DIST the *)
(* default value of 1000.0. See CutOffValue also. *)
(* See Start's Proc InitValues. *)
```

```
CutOffValue: REAL; (* The cutoff for gamble values in certain *)
(* rules, such as Satisficing. Entering a value of *)
(* zero will allow CutOffVal to default to the mean *)
(* of DIST. See START's Proc Initialize. *)
```

```
RulesToRun: String(15);
(* A string of characters where 'Y' means a rule is *)
(* to be run, corresponding to the rules in their *)
(* order as defined in the list of rules in this *)
(* section. *)
```

```
DomExist: REAL; (* if the set contains a dominated alternative *)
(* Not used in current version. *)
```

```
(* Count of times each oper is executed. *)
OperationCount: ARRAY[OperResults] OF INTEGER;
(* Not a program header in current version...*)
```

```
($list-)
```

```
PROCEDURE Initialize;
(* Initialize all our values and derivatives of values for a particular *)
(* random setup. *)
```

```
BEGIN
END;
```

```

(*****)
(* VERSION 1.2                                TIMED RISKLESS SIM *)
(* SIM.PAS                                    11/12/85          *)
(*****)
(* Var "NumDomAltern" controls # dominated alterns/set.      *)
(* 6/6/85 - SIM divided into risky & riskless verisons;     *)
(* Risky assigned at start of Decide instead of pgm hdr.    *)
(* FmtPrt pgm hdr allows edited or consensed output.        *)
(* 9/27/85 - Method of deriving best choice value for JP Index *)
(* changed, since AU Rule under time pressure can't provide. *)
(*****)

```

```

{$LIST+}
{$include:'fformsuo.int'} (* INCLUDES changed back to *)
{$include:'screenvv.int'} (* order and content of old *)
{$include:'sim.int'}      (* working version. *)
{$include:'start.int'}
{$include:'decrules.int'}
{$include:'random.int'}

```

```

PROGRAM Decide(Input,Output,RunSim,Debug,NRun,NAlternatives,NAttributes,
               FmtPrt,WinsOut,TraceOut,Gamble,SigFile,WtsFile,Tran,PG,
               TimeLimit,NumDomAltern,CVEq,Corr,JND,DSeed,Dist,CutOffValue,
               RulesToRun);

```

```

USES Sim,Random,decrules,fformsuo,screenvv;

```

```

( * * * * * )
(* Main Program *)
( * * * * * )

```

```

PROCEDURE InitData;

```

```

BEGIN

```

```

    rewrite (TraceOut);
    rewrite (Gamble);
    reset   (SigFile);
    reset   (WtsFile);

```

```

    (* Read "time/weights" values from WtsFile into array OpWtArr, *)
    (* for later access by each operator procedure in LSTPRIMS and *)
    (* STMPRIMS modules. 16 operators in all. O=type OperResults. *)
    FOR O := Empty to AttAbsence DO
        Read(WtsFile, OpWtArr[O]);

```

```

    (* Initialize array used to hold number of times a rule selects *)
    (* the best choice: *)
    FOR Rule := Rand to Satisficing DO
        BestChoice[Rule] := 0;

```

```

    (* Initialize variables used to hold the reachedlimit values, and *)

```

```

(* to pass them from the DECRULES module here for output: *)
EBALimit := 0;      (* EBA *)
LexLimit  := 0;      (* LexiSemi *)
LxLimit   := 0;      (* Lexi *)
EqWLimit  := 0;      (* EqualWeight *)
MCDLimit  := 0;      (* MCD *)
EEULimit  := 0;      (* EBAEU *)
ECDLimit  := 0;      (* EBAMCD *)
SatLimit  := 0;      (* Satisficing *)
AdULimit  := 0;      (* AddUtility *)

(* Counters output from selected rules: *)
EBARulCnt := 0; EBARndCnt :=0;      (* Elimination by Attributes *)
SatRulCnt := 0; SatRndCnt :=0;      (* Satisficing *)
LSORulCnt := 0; LSORndCnt :=0;      (* LexicographicSemiOrder *)
MCDTieCnt := 0;                      (* Maj Confirming Dimensions *)

(* Indices used to output 1st 10 altern choices, w/WinsOut: *)
j := 0; k := 0; l := 0; m := 0; n := 0; p := 0; q := 0; r := 0;
s := 0;

FOR Rule := Rand to Satisficing DO BEGIN
  MeanData[Rule].DomValues := 0;
  MeanData[Rule].DomExist := 0;
  MeanData[Rule].ChoiceValues := 0;
  MeanData[Rule].ChoiceRanking := 0;
  MeanData[Rule].ChoiceUtils := 0;
  MeanData[Rule].ChoiceURank := 0;

  FOR O:= Empty TO AttAbsence DO
    MeanData[Rule].OperationCount[O] := 0;

  StdData[Rule].DomValues := 0;
  StdData[Rule].DomExist := 0;
  StdData[Rule].ChoiceValues := 0;
  StdData[Rule].ChoiceRanking := 0;
  StdData[Rule].ChoiceUtils :=0;
  StdData[Rule].ChoiceURank := 0;

  FOR O:= Empty TO AttAbsence DO
    StdData[Rule].OperationCount[O] := 0;

  Used[Rule] := FALSE {Remember that we used this one}
END; {FOR}

      END;      {InitData}

(*****
(* Decide *)
*****)

BEGIN (* Decide *)

(* Assign risk mode for riskless: *)
Risky := FALSE;

```

```

{Code for initialization of display}

cls;                                     {Clear the screen at startup}

cursetv(1,26);
Write(output,'Timed Riskless DecisionLab V2.0');
Cursetv(4,7);
Write('Number of Alternatives: ',NAlternatives:3);
Cursetv(4,42);
write('Number of Attributes: ',NAttributes:3);
Cursetv(5,7);
write('Number of Trials: ',NRun:3);
Cursetv(5,42);
write('Time Limit: ',TimeLimit:3:0);
Cursetv(6,7);
write('Distribution: ',Dist:4:0);
Cursetv(6,42);
write('Cut Off Value: ',CutOffValue:4:0);
Cursetv(7,7);
write('Tran: ');
Cursetv(7,13);
If Tran=1 then write('Thorngate');
If Tran=2 then write('Uniform Hyperplane');
If Tran=3 then write('Dirichlet');
Cursetv(7,42);
write('PG: ');
Cursetv(7,46);
If PG=1 then write('No Dominance');
If PG=2 then write('Dominance');
If PG=3 then write('Correlated Attributes');
Cursetv(8,34);
write('JND: ',JND:4:3);

cursetv(10,0);
for j := 1 to 80 do
Write(chr(205));
Cursetv(24,0);
attribv(0,7,' ',80);
    (* Set up raw data arrays *)

cursetv(24,0);
write(output,'Starting...');

InitData;    (* Perform the initializing procedure above. *)

IF FmtPrt = TRUE THEN
    WriteLn (Gamble, 'Tran = ', Tran:2, ' ', 'PG = ', PG:2);

FOR I:= 1 TO NRun DO BEGIN
    cursetv(24,0);
    write(output,'
    cursetv(24,0);
    write(output,'Trial Number: ',i:3);
    cursetv(24,40);
    write('Generating Randoms');

    Initialize;

```

```

(**** Condition: run rules or just generate gambles: ****)
IF RunSim = 1 THEN
(**** Riskless rules selected by user via pgm header: ****)
BEGIN
  IF RulesToRun[1] = 'Y' THEN DoARule(Rand);
(* Run AddUtility -- no time pressure -- for baseline: *)
  DoARule(AddUtility);
  IF RulesToRun[2] = 'Y' THEN DoARule(TimedAU);
  IF RulesToRun[3] = 'Y' THEN DoARule(EBA);
  IF RulesToRun[4] = 'Y' THEN DoARule(LexiSemi);
  IF RulesToRun[5] = 'Y' THEN DoARule(Lexi);
  IF RulesToRun[6] = 'Y' THEN DoARule(EqualWeight);
  IF RulesToRun[7] = 'Y' THEN DoARule(MCD);
  IF RulesToRun[8] = 'Y' THEN DoARule(EBAEU);
  IF RulesToRun[9] = 'Y' THEN DoARule(EBAMCD);
  IF RulesToRun[10] = 'Y' THEN DoARule(Satisficing);
END; (* IF *)
END; (* FOR *)

(* Write out the data array *)
IF RunSim = 1 THEN
BEGIN

cursetvv(24,40);
WRITE (Output,'Calculating Statistics...');
IF FmtPrt = TRUE THEN
BEGIN
  WRITELN(TraceOut,' ');
  WRITELN(TraceOut,' ');
  WRITELN(TraceOut,'TIMED RISKLESS TRACEOUT FILE:');
  WRITELN(TraceOut,' ');
  WRITELN(TraceOut,'-----',
  '-----');
END;

FOR Rule := Rand TO Satisficing DO
  IF Used[Rule] THEN
  BEGIN
    IF FmtPrt = TRUE THEN (* for formatted output *)
(* Notice that rule 'numbers' have changed...with the addition of *)
(* the timed AU rule, in addition to regular AU rule. *)
    BEGIN
      Writeln(TraceOut, ' ');
      CASE Rule OF
        Rand:      Write (TraceOut, '0 RAND           ');
        AddUtility: Write (TraceOut, '1 ADDUTILITY      ');
        TimedAu:   Write (TraceOut, '2 TIMED ADDUTILITY ');
        EBA:       Write (TraceOut, '3 EBA             ');
        LexiSemi:  Write (TraceOut, '4 LEXISEMI        ');
        Lexi:      Write (TraceOut, '5 LEXI            ');
        EqualWeight: Write (TraceOut, '6 EQUALWEIGHT     ');
        MCD:       Write (TraceOut, '7 MCD             ');
        EBAEU:     Write (TraceOut, '8 EBAEU           ');
        EBAMCD:    Write (TraceOut, '9 EBAMCD          ');
        Satisficing: Write (TraceOut, '10 SATISFICING    ');
      END; (* Case *)
    END; (* IF FmtPrt *)

    WITH MeanData[Rule] DO
      BEGIN

```

```

IF FmtPrt = TRUE THEN (* for formatted output *)
BEGIN
  WRITELN(TraceOut, 'Runs: ', NRun:2);
  WRITE (TraceOut, 'Tran: ');
  IF (Tran=1) THEN
    WRITE(TraceOut, 'THORN ') ELSE
  IF (Tran=2) THEN
    WRITE(TraceOut, 'UH ') ELSE
  (* (Tran=3) *)
    WRITE(TraceOut, 'DIRICH ');
  WRITE (TraceOut, 'PG: ');
  IF (PG=1) THEN
    WRITELN(TraceOut, 'No Dominance') ELSE
  IF (PG=2) THEN
    WRITELN(TraceOut, 'Dominance');
  IF (PG=3) THEN
    IF CVEq = FALSE THEN
      WRITELN(TraceOut,
        'Correlated Attributes (unequal)')
    ELSE
      WRITELN(TraceOut, 'Correlated Attributes (equal)',
        ' Corr = ', Corr:2:2);
  WRITELN(TraceOut, 'Alt X Att: ', NAlternatives:2,
    ' X ', NAttributes:2, ' ',
    'JND: ', JND:4:4);
  WRITELN(TraceOut, 'Dist = ', Dist:4:0, ' ',
    'CutOffValue = ', CutOffValue:4:0);
  WRITELN(TraceOut, 'Time Limit = ', TimeLimit:5:0);
  WRITELN(TraceOut, '-----',
    '-----');
  WRITELN(TraceOut, ' ', 'MEAN: ',
    ' ', 'STDDEV:');
END (* IF FmtPrt *)

ELSE (* for condensed output *)
  Write(TraceOut, Ord(Rule):2, NAlternatives:2,
    NAttributes:2, NRun:4, Tran:3,
    PG:3, ' ', JND:6:4, Dist:6:0, CutOffValue:5:0,
    TimeLimit:5:0);

StdDev:=(SQRT(StdData[Rule].DomValues -(SQR(DomValues) / NRun))
/ (NRun - 1));
Mean := DomValues/NRun;
IF FmtPrt = TRUE THEN (* for formatted output *)
BEGIN
  WRITELN(TraceOut, 'DOMVALUES: ', Mean: 8:3,
    ' ', StdDev: 8:3);
END
ELSE (* for condensed output *)
  Write(TraceOut, Mean: 10:3, StdDev: 10:3);

StdDev:=(SQRT(StdData[Rule].DomExist -(SQR(DomExist) / NRun))
/ (NRun - 1));
Mean := DomExist/NRun;
If FmtPrt = TRUE THEN (* for formatted output *)
BEGIN
  WRITELN(TraceOut, 'DOMEXIST: ', Mean: 8:3,
    ' ', StdDev: 8:3);
END

```





```

(* the condensed output data. *)
(***** *)
IF (MCVArr[1]>0.0) AND (MCVArr[2]>0.0)
  AND (MCVArr[3]>0.0) AND
  ((MCVArr[2]-MCVArr[1])>0) THEN
  JPIdx:=(MCVArr[3]-MCVArr[1])/(MCVArr[2]-MCVArr[1]);
IF (FmtPrt = TRUE) AND (Rule <> Rand)
  AND (Rule <> AddUtility) THEN
BEGIN
  IF ((MCVArr[2]-MCVArr[1]) <= 0) THEN
    Writeln(TraceOut,
      'Divide by zero precludes JP Index calculation.')
  ELSE
    Writeln(TraceOut, 'JP Index = ', JPIdx:7:2);
END;

IF (FmtPrt = FALSE) THEN
BEGIN
  IF (Rule = RAND)
    OR (Rule = AddUtility) THEN
    Write(TraceOut, ' . ');
  IF (Rule <> Rand) AND (Rule <> AddUtility) THEN
  BEGIN
    IF ((MCVArr[2]-MCVArr[1]) > 0) THEN
      Write(Traceout, JPIdx:7:2)
    ELSE
      Write(Traceout, ' . ');
  END;
END;

(***** *)
(* Calculate the proportion of times a rule picks the best alterna- *)
(* tive. A counter has been kept in the array BestChoice for each *)
(* rule, incremented in DecRules. *)
(***** *)

Proportion := BestChoice[Rule];

Proportion := Proportion / NRun;

IF (FmtPrt = TRUE) THEN
  Writeln(TraceOut, 'Proportion of correct choices = ',
    Proportion:4:2);
IF (FmtPrt = FALSE) THEN
BEGIN
  Write (TraceOut, ' ');
  Write (TraceOut, Proportion:4:2);
END;

(***** *)
(* Output certain debugging & other information for rules: *)
(***** *)

IF ((FmtPrt=TRUE) AND (Rule=Rand)) THEN
  Writeln(TraceOut, ' ');
IF ((FmtPrt=FALSE) AND (Rule=Rand)) THEN
BEGIN
  Write (TraceOut, ' ');

```

```

    Writeln(TraceOut, ' . ');
END;

IF ((FmtPrt=TRUE) AND (Rule=AddUtility)) THEN
BEGIN
    Write (TraceOut, '*** Run without a time limit as a baseline. ');
    Writeln(TraceOut, ' ');
    WRITELN(TraceOut, '-----',
            '-----');
    Writeln(TraceOut, ' ');
END;

IF (FmtPrt=FALSE) AND (Rule=AddUtility) THEN
    Writeln(TraceOut, ' . ');

IF ((FmtPrt=TRUE) AND (Rule=TimedAU)) THEN
BEGIN
    Write (TraceOut, 'Number of trials reaching time limit: ');
    Writeln(TraceOut, AdULimit:6);
    IF (WinsOut=TRUE) THEN
    BEGIN
        Write (TraceOut, 'Choices for Timed AU: ');
        FOR j := 1 to 10 DO
            Write (TraceOut, AdUDec[j]:2);
        END;
        Writeln(TraceOut, ' ');
        WRITELN(TraceOut, '-----',
                '-----');
        Writeln(TraceOut, ' ');
    END;

IF (FmtPrt=FALSE) AND (Rule=TimedAU) THEN
BEGIN
    Write (TraceOut, ' ');
    Writeln(TraceOut, AdULimit:6);
END;

IF ((FmtPrt=TRUE) AND (Rule = EBA)) THEN
BEGIN
    Write (TraceOut, 'Number of Picks by Rule = ', EBARulCnt:5,
            ' ');
    Writeln(TraceOut, 'Number of Random Picks = ', EBARndCnt:5);
    Write (TraceOut, 'Number of trials reaching time limit = ');
    Writeln(TraceOut, EBALimit:6);
    IF WinsOut=TRUE THEN
    BEGIN
        Write (TraceOut, 'Choices for EBA: ');
        FOR j := 1 to 10 DO
            WRITE (TraceOut, EBADec[j]:2);
        END;
        Writeln(TraceOut, ' ');
        WRITELN(TraceOut, '-----',
                '-----');
        Writeln(TraceOut, ' ');
    END;

```

END;

```
IF (FmtPrt=FALSE) AND (Rule=EBA) THEN
BEGIN
  Write (TraceOut, ' ');
  Writeln(TraceOut, EBALimit:6);
END;
```

```
IF ((FmtPrt=TRUE) AND (Rule = LexiSemi)) THEN
BEGIN
  Write (Traceout, 'Number of Picks by Rule = ',LSORulCnt:5,
        ' ');
  Writeln(Traceout, 'Number of Random Picks = ',LSORndCnt:5);
  Write (TraceOut, 'Number of trials reaching time limit = ');
  Writeln(TraceOut, LexLimit:6);
  IF WinsOut=TRUE THEN
  BEGIN
    Write (TraceOut, 'Choices for LexiSemi: ');
    FOR j := 1 to 10 DO
      Write (TraceOut, LexDec[j]:2);
  END;
  Writeln(TraceOut, ' ');
  WRITELN(TraceOut, '-----',
        '-----');
  Writeln(Traceout, ' ');
END;
```

```
IF (FmtPrt=FALSE) AND (Rule=LexiSemi) THEN
BEGIN
  Write (TraceOut, ' ');
  Writeln(TraceOut, LexLimit:6);
END;
```

```
IF ((FmtPrt=TRUE) AND (Rule = Lexi)) THEN
BEGIN
  Write (TraceOut, 'Number of trials reaching time limit = ');
  Writeln(TraceOut, LxLimit:6);
  IF WinsOut=TRUE THEN
  BEGIN
    Write (TraceOut, 'Choices for Lexi: ');
    FOR s := 1 to 10 DO
      Write (TraceOut, LxDec[s]:2);
  END;
  Writeln(TraceOut, ' ');
  WRITELN(TraceOut, '-----',
        '-----');
  Writeln(Traceout, ' ');
END;
```

```
IF (FmtPrt=FALSE) AND (Rule=Lexi) THEN
BEGIN
  Write (TraceOut, ' ');
  Writeln(TraceOut, LxLimit:6);
END;
```

```
IF ((FmtPrt=TRUE) AND (Rule=EqualWeight)) THEN
```

```

BEGIN
  Write (TraceOut, 'Number of trials reaching time limit = ');
  Writeln(TraceOut, EqWLimit:6);
  IF (WinsOut=TRUE) THEN
  BEGIN
    Write (TraceOut, 'Choices for EqualWeight: ');
    FOR j := 1 to 10 DO
      Write (TraceOut, EqWDec[j]:2);
    END;
    Writeln(TraceOut, ' ');
    WRITELN(TraceOut, '-----',
      '-----');
    Writeln(Traceout, ' ');
  END;

  IF (FmtPrt=FALSE) AND (Rule=EqualWeight) THEN
  BEGIN
    Write (TraceOut, ' ');
    Writeln(TraceOut, EqWLimit:6);
  END;

  IF ((FmtPrt=TRUE) AND (Rule = MCD)) THEN
  BEGIN
    Writeln(TraceOut, 'Number of Ties between Alternatives in ',
      NRun:3, ' Runs = ', MCDTieCnt:3);
    Write (TraceOut, 'Number of trials reaching time limit = ');
    Writeln(TraceOut, MCDLimit:6);
    IF WinsOut=TRUE THEN
    BEGIN
      Write (TraceOut, 'Choices for MCD: ');
      FOR j := 1 to 10 DO
        Write (TraceOut, MCDDec[j]:2);
      END;
      Writeln(Traceout, ' ');
      WRITELN(TraceOut, '-----',
        '-----');
      Writeln(Traceout, ' ');
    END;

    IF (FmtPrt=FALSE) AND (Rule=MCD) THEN
    BEGIN
      Write (TraceOut, ' ');
      Writeln(TraceOut, MCDLimit:6);
    END;

    IF ((FmtPrt=TRUE) AND (Rule=EBAEU)) THEN
    BEGIN
      Write (TraceOut, 'Number of trials reaching time limit = ');
      Writeln(TraceOut, EEULimit:6);
      IF (WinsOut=TRUE) THEN
      BEGIN
        Writeln(TraceOut, 'When number of alternatives reaches < 3,');
        Writeln(TraceOut, 'AddUtility rule entered; choice = 0. ');
        Write (TraceOut, 'Choices for EBAEU: ');
        FOR j := 1 to 10 DO
          Write (TraceOut, EEUDec[j]:2);
        END;
      END;
    END;
  END;

```

```

END;
Writeln(TraceOut, ' ');
WRITELN(TraceOut, '-----',
'-----');
Writeln(Traceout, ' ');
END;

IF (FmtPrt=FALSE) and (Rule=EBAEU) THEN
BEGIN
  Write (TraceOut, ' ');
  Writeln(TraceOut, EEULimit:6);
END;

IF ((FmtPrt=TRUE) AND (Rule=EBAMCD)) THEN
BEGIN
  Write (TraceOut, 'Number of trials reaching time limit = ');
  Writeln(TraceOut, ECDDLimit:6);
  IF (WinsOut=TRUE) THEN
  BEGIN
    Writeln(TraceOut, 'When number of alternatives reaches 3,');
    Writeln(TraceOut, 'MCD rule entered; choice = 0. ');
    Write (TraceOut, 'Choices for EBAMCD: ');
    FOR j := 1 to 10 DO
      Write (TraceOut, ECDDec[j]:2);
  END;
  Writeln(TraceOut, ' ');
  WRITELN(TraceOut, '-----',
'-----');
  Writeln(Traceout, ' ');
END;

IF (FmtPrt=FALSE) AND (Rule=EBAMCD) THEN
BEGIN
  Write (TraceOut, ' ');
  Writeln(TraceOut, ECDDLimit:6);
END;

IF ((FmtPrt=TRUE) AND (Rule = Satisficing)) THEN
BEGIN
  Write (Traceout, 'Number of Picks by Rule = ', SatRulCnt:5,
' ');
  Writeln(Traceout, 'Number of Random Picks = ', SatRndCnt:5);
  Write (TraceOut, 'Number of trials reaching time limit = ');
  Writeln(TraceOut, SatLimit:6);
  IF WinsOut=TRUE THEN
  BEGIN
    Write (TraceOut, 'Choices for Satisficing: ');
    For j := 1 to 10 DO
      Write (Traceout, SatDec[j]:2);
  END;
  Writeln(Traceout, ' ');
  WRITELN(TraceOut, '-----',
'-----');
  Writeln(Traceout, ' ');
END;

```

```
IF (FmtPrt=FALSE) AND (Rule=Satisficing) THEN
BEGIN
  Write (TraceOut, ' ');
  Writeln(TraceOut, SatLimit:6);
END;
```

```
END; (* If Used[Rule] *)
```

```
END; (* IF RunSim... *)
```

```
END. (* Decide *)
```

```
{ $linesize:130 }  
INTERFACE;  
UNIT Start(Initialize);  
{ $list- }  
  
PROCEDURE Initialize;  
(* Initialize all our values and derivatives of values for a particular *)  
(* random setup. *)  
  
END;
```

```

(*****
(* VERSION 1.2                                SIM RISKLESS    *)
(* START.PAS                                  2/11/86         *)
(*****

```

```

($list+)
($include:'sim.int')
($include:'numprims.int')
($include:'StmPrims.int')
($include:'Random.int')
($include:'fformsuu.int')
($include:'screenvv.int')

```

```

IMPLEMENTATION OF Sim;
USES NumPrims,StmPrims,Random,fformsuu,screenvv;

```

```

(* * * * * *)
(* Modifications: 7/84 - Add SetUpDominance routines. *)
(* 8/10/84 - Add code to allow Tran0,1 without a *)
(* specific number of dominated alternatives. *)
(* 8/20/84 - Debug & simplify initialize code to *)
(* produce good gamble data for PROCESS1 program. *)
(* 10/30/84 - In Proc InitProbabilities, add another *)
(* option (Tran=99) to allow generation of weights by calling *)
(* a new procedure in Random: Dirichlet. *)
(* 6/21/85 - Streamlined code; added Corr. Att. Tran now 1, 2, or *)
(* 3 for prob generation. PG (PayOffGenerator) designates dom, no *)
(* dom, or corr. att. to generate payoffs. *)
(* * * * * * *)
(* START.PAS. (Initialization) Procedure SetUpDominance added. *)
(* Generates a specific # of dom alterns; requires 3 attributes x *)
(* 4 alterns. Vars RunSim & NumDomAltern added to hdr/globals in *)
(* SIM. If NumDomAltern=0 then for Tran=0 or 1, dom occurs ran- *)
(* domly, and the # of attributes & alternatives can be up to 8x8. *)
(* * * * * * *)

```

```

PROCEDURE Initialize;

```

```

    VAR AttNum,AltNum: INTEGER;
        InvMap,InvUMap: AltMap;
        OperIndx : OperResults;
        SetHasDominance: BOOLEAN;          (* added *)

```

```

(*****
(* PROCEDURE SetUpDominance: generates a specific # of dom*)
(* alterns/set of generated probabilities & payoffs for *)
(* tran=0 or 1. NAttributes must = 3. *)
(*****

```

```

PROCEDURE SetUpDominance;

```

```

CONST

```

```

    Lo = 1;          (* indexes to array PayOffMatrix and to *)
    Mid = 2;         (* corresponding ProbMatrix array cells. *)
    Hi = 3;

```

```

TYPE

```

```

    PairMatrix = Array[1..66,1..2] of INTEGER;
    (* Holds results of FindPairs Procedure. Maximum # *)

```

```

(* of pairs w/12 alternatives is 66. *)
PayProbMatrix = Array[1..12,1..3] of REAL;
RealArr = Array[1..3] of REAL;
SixCellArr = Vector(6);
(* TwoSetsPayOffs of type SixCellArr is passed to *)
(* Vsrta sort, which expects a super array param. *)
(* This is super arr (real) Vector w/upper bound=6. *)
DomArr = Map(MaxAlternatives);
(* DomArr must be able to hold up to MaxAltern. # of *)
(* cells. Map is a super array of integer. *)

```

VAR

```

AltNum, AttNum: INTEGER; (* indexes in FOR stmts. *)
Pairs: PairMatrix;
(* Holds all unique pairs of alternatives. *)
PayOffMatrix, ProbMatrix: PayProbMatrix;
(* Arrays which receive values from "Values" matrix. *)
TempPayArr, TempProbArr: RealArr;
(* Temporary holding arrays, passed to sort routine. *)
DomSwitch: DomArr;
(* Holds count of # altern in a set which show dom. *)
NbrPrs: INTEGER;
(* Number of unique prs found in procedure FindPairs. *)
AltA, AltB: INTEGER;
(* Alternative numbers of 1 pair of alternatives. *)
PairSet: INTEGER;
(* Index to Pairs array. *)
TwoSetsPayOffs: SixCellArr;
(* Payoffs from a 3-attribute pair of gambles. *)
CumAlt, CumAltA, CumAltB: SixCellArr;
(* Holding arrays for comparisons. *)
Alt, Sw, i, j: INTEGER;
DomAlternCounter: INTEGER;
(* Counts # switches set in DomSwitch Array; ie, the *)
(* # dominated alternatives in a set. *)

```

```

(***** Nested Procedure *****)
PROCEDURE ModVsrtr(VAR A:RealArr; la:INTEGER; VAR ir:RealArr);
(* Modification of Vsrtr sort. Allows contents of mapped *)
(* "ir" array to be real. Here, ir holds probabilities. *)

```

VAR

```

  jmp, m, n: INTEGER;
  tmp, tindex: REAL;
  sorted: BOOLEAN;

```

```

BEGIN (* ModVsrtr *)
  jmp := la;
  WHILE jmp > 1 DO
  BEGIN
    jmp := jmp DIV 2;
    REPEAT
      sorted := TRUE;
      FOR m := 1 to la - jmp DO
      BEGIN
        n := m + jmp;
        IF A[m] > A[n] THEN
          BEGIN

```

```

        tmp := A[m];  tindex := ir[m];
        A[m] := A[n];  ir[m] := ir[n];
        A[n] := tmp;  ir[n] := tindex;
        sorted := FALSE;
    END; (* IF *)
END; (* FOR *)
UNTIL sorted;
END; (* WHILE *)
END; (* ModVsrtr *)

```

```

(***** Nested Procedure *****)

```

```

PROCEDURE FindPairs;
(* Finds all unique pairs of alternatives and puts them *)
(* in Pairs matrix.  NbrPrs holds the total # unique prs. *)

```

```

VAR

```

```

    Sw, x, y, i, j: INTEGER;

```

```

BEGIN (* FindPairs *)

```

```

    Y := 2;

```

```

    i := 0;

```

```

    j := 1;

```

```

    Sw := 0;

```

```

NbrPrs := 0;      (* initialize counter *)

```

```

FOR x := 1 to (NAlternatives - 1) DO

```

```

    BEGIN

```

```

        IF Sw = 1

```

```

            THEN y := (x + 1);

```

```

        WHILE y <= NAlternatives DO

```

```

            BEGIN

```

```

                i := i + 1;

```

```

                Pairs[i,j] := x;

```

```

                j := j + 1;

```

```

                Pairs[i,j] := y;

```

```

                NbrPrs := NbrPrs + 1;      (* increment counter *)

```

```

                j := 1;

```

```

                y := y + 1;

```

```

            END; (* WHILE *)

```

```

        Sw := 1;

```

```

    END; (* FOR *)

```

```

END; (* FindPairs *)

```

```

(*****

```

```

(*  SetUpDominance

```

```

*****

```

```

BEGIN (* SetUpDominance *)

```

```

    For AltNum := 1 to NAlternatives DO

```

```

        BEGIN

```

```

            DomSwitch[AltNum] := 0;      (* init switch array. *)

```

```

        (* MATRIX ROW TO ARRAY: Put a row from Value matrix *)

```

```

        (* into 2 temp arrays, to send to sort procedure. *)

```

```

        For AttNum := 1 to NAttributes DO

```

```

            BEGIN

```

```

                TempPayArr[AttNum] := Values[AltNum,AttNum];

```

```

                TempProbArr[AttNum] := Values[AltNum,AttNum+NAttributes];

```

```

END; (* FOR *)

(* SORT ARRAYS: Sort payoffs lo to hi, keeping *)
(* corresponding probability array in payoff order. *)
ModVsrtr(TempPayArr,NAttributes,TempProbArr);

(* ARRAYS TO MATRIX ROWS: Put sorted temp arrays into *)
(* the current AltNum row of payoff/prob matrices. *)
For AttNum := 1 to NAttributes DO
BEGIN
    PayOffMatrix[AltNum,AttNum] := TempPayArr[AttNum];
    ProbMatrix[AltNum,AttNum] := TempProbArr[AttNum];
END;
END; (* FOR *)

(* Find all the possible unique pairs of alternatives. *)
FindPairs;

(* Second big loop of SetUpDominance begins here. Ea. *)
(* pair in the set is tested for dominance. *)
FOR PairSet := 1 to NbrPrs DO
BEGIN
    AltA := Pairs[PairSet,1];
    AltB := Pairs[PairSet,2];

(* Combine the 3 payoffs of ea. altern into 1 array. *)
    j := 1;
    FOR i := 1 to 3 DO
    BEGIN
        TwoSetsPayOffs[i] := PayOffMatrix[AltA,j];
        j := j + 1;
    END; (* FOR *)
    j := 1;
    FOR i := 4 to 6 DO
    BEGIN
        TwoSetsPayOffs[i] := PayOffMatrix[AltB,j];
        j := j + 1;
    END; (* FOR *)
    (* End "Combine the 3..." *)

(* Sort the 6-cell array of payoffs from low to high. *)
Vsrta(TwoSetsPayOffs,6);

(* Run through the CUM rules, comparing each value in *)
(* the 6-cell ordered array vs. Lo, Mid, and Hi values*)
(* in the PayOffMatrix for both alternatives of the *)
(* pair being considered. Based on comparisons, enter*)
(* values in 2 new 6-cell arrays: CumAltA & CumAltB. *)
Sw := 0;
For Alt := AltA to AltB do
BEGIN
    FOR i := 1 to 6 DO
    BEGIN
        (***** CUM RULES *****)
        IF TwoSetsPayOffs[i] < PayOffMatrix[Alt,Lo]
            THEN CumAlt[i] := 0;
        IF TwoSetsPayOffs[i] >= PayOffMatrix[Alt,Lo] THEN
            IF TwoSetsPayOffs[i] < PayOffMatrix[Alt,Mid]
                THEN CumAlt[i] := ProbMatrix[Alt,Lo];
            IF TwoSetsPayOffs[i] >= PayOffMatrix[Alt,Mid] THEN

```

```

        IF TwoSetsPayOffs[i] < PayOffMatrix[Alt,Hi]
            THEN CumAlt[i] := (ProbMatrix[Alt,Lo] +
                ProbMatrix[Alt,Mid]);
        IF TwoSetsPayOffs[i] >= PayOffMatrix[Alt,Hi]
            THEN CumAlt[i] := 1;
    END; (* FOR *)

    IF Sw = 0 THEN          (* 1st pass: put values derived *)
        CumAltA := CumAlt  (* from AltA into array CumAltA.*)
    ELSE
        CumAltB := CumAlt; (* 2nd pass: put values derived *)
        Sw := 1;          (* from AltB into array CumAltB.*)
    END; (* FOR *)

    (* Compare the contents of the 6-cell arrays of cumu- *)
    (* lative probabilities to each other; set switches. *)

    IF CumAltA[1] >= CumAltB[1] THEN
        IF CumAltA[2] >= CumAltB[2] THEN
            IF CumAltA[3] >= CumAltB[3] THEN
                IF CumAltA[4] >= CumAltB[4] THEN
                    IF CumAltA[5] >= CumAltB[5] THEN
                        IF CumAltA[6] >= CumAltB[6] THEN
                            DomSwitch[AltA] := 1;
            IF CumAltA[1] <= CumAltB[1] THEN
                IF CumAltA[2] <= CumAltB[2] THEN
                    IF CumAltA[3] <= CumAltB[3] THEN
                        IF CumAltA[4] <= CumAltB[4] THEN
                            IF CumAltA[5] <= CumAltB[5] THEN
                                IF CumAltA[6] <= CumAltB[6] THEN
                                    DomSwitch[AltB] := 1;
    END; (* PairSet Loop. Loops until all pairs of alter- *)
    (* natives in a set of gambles has been considered. *)

    (* Check to see if NumDomAltern # of switches are on, by *)
    (* adding contents of DomSwitch array. *)
    DomAlternCounter := 0; (* initialize *)
    For i := 1 to NAlternatives DO
    BEGIN
        DomAlternCounter := (DomAlternCounter + DomSwitch[i]);
    END;

    (* Set the Boolean condition used to determine whether *)
    (* to keep or discard this generated gamble set. *)
    IF DomAlternCounter = NumDomAltern
        THEN SetHasDominance := TRUE;

END; (* Procedure SetUpDominance *)

```

{ \$list- }

```

PROCEDURE InitValues(VAR AttValues: TwoXAttVec);
(* Initialize attribute VALUES *)
(* 4/22/85 - Distribution now entered as user input, or if *)
(* entered as a zero (no choice) defaults to 1000.0. *)

    VAR AttNum,Tnrand: INTEGER;
        TempValues: AttVec;

```

```

BEGIN (* InitValues *)
  Tnrand := 12;
  Ggubs(DSeed,Tnrand,TempValues);

(* Multiply payoffs to $1000 or to distribution entered by user. *)
  IF Dist = 0 THEN (* Zero allows default. *)
    FOR AttNum := 1 to NAttributes DO
      AttValues[AttNum]:= TempValues[AttNum]*1000.0;
  IF Dist > 0 THEN (* Value chosen by user. *)
    FOR AttNum := 1 to NAttributes DO
      AttValues[AttNum]:= TempValues[AttNum]*Dist;

  END; (* InitValues *)

```

```

PROCEDURE InitProbabilities(VAR AttValues: TwoXAttVec);
(* Initialize attribute PROBABILITIES *)
(* Tran = 1 = Thorngate *)
(* Tran = 2 = Uniform Hyperplane *)
(* Tran = 3 = Dirichlet *)

  VAR AttNum: INTEGER;
  TempValues: AttVec;

  BEGIN (* InitProbabilities *)
    IF (Tran = 1) THEN
      GenProbs(TempValues,NAttributes);
    IF (Tran = 2) THEN
      Hostile(TempValues,NAttributes);
    IF (Tran = 3) THEN
      Dirichlet(TempValues,NAttributes);
    FOR AttNum:= 1 TO NAttributes DO
      AttValues[AttNum + NAttributes]:= TempValues[AttNum];

  END; (* InitProbabilities *)

```

```

FUNCTION CalcValue(CONST AttValues: TwoXAttVec): REAL [PURE];
(* Calculate the total Value for this choice *)

  VAR AttNum: INTEGER;

  BEGIN (* CalcValue *)
    CalcValue := 0;
    FOR AttNum:= 1 TO NAttributes DO
      CalcValue := RESULT (CalcValue) +
        AttValues[AttNum] * AttValues[AttNum + NAttributes];

  END; (* CalcValue *)

```

```

FUNCTION CalcUtils(CONST AttUtils:TwoXAttVec):REAL [PURE];
{Calculate Total Utility for this choice}
  VAR AttNum: INTEGER;

  BEGIN (* CalcUtils *)
    CalcUtils := 0;

```

```

FOR AttNum:= 1 TO NAttributes DO
  (* the exponential, et al. is equivalent to x^2/3 *)
  CalcUtils := RESULT (CalcUtils) +
    exp(ln(AttUtils[AttNum]) * (2.0 / 3.0)) *
    AttUtils[AttNum + NAttributes];

```

```

END; (* CalcUtils *)

```

```

PROCEDURE PutInSortedPosition(VAR Posits: AltMap; PositValues: AltVec;
                             LastPosit: INTEGER);

```

```

(* Put LastPosit in proper position in Posits, s.t. Posits is *)
(* sorted according to the values of Posits in PositValues. *)

```

```

VAR SortInd: INTEGER;

```

```

BEGIN (* PutInSortedPosition *)

```

```

  Posits[LastPosit]:= LastPosit;

```

```

  SortInd:= LastPosit;

```

```

  IF LastPosit > 1 THEN

```

```

    WHILE PositValues[Posits[SortInd]] <
      PositValues[Posits[SortInd-1]] DO BEGIN

```

```

      ISwap(Posits[SortInd],Posits[SortInd-1]);

```

```

      IF SortInd > 2 THEN
        SortInd:= SortInd-1;

```

```

      (* else loop terminates because swap made them be in order.

```

```

      END; (* WHILE *)

```

```

  END; (* PutInSortedPosition *)

```

```

PROCEDURE StochValues;

```

```

VAR

```

```

  Index,TempOrder : AltMap;

```

```

  Temp : ARRAY [1..2] OF INTEGER;

```

```

  Order : ARRAY [1..MaxAlternatives,1..MaxAttributes] OF INTEGER;
  (* Temporary matrix in which orders are constructed. *)

```

```

  TempRand : AttVec;

```

```

  TXTempRand: TwoXAttvec;

```

```

  Pair : ARRAY[1..MaxAlternatives,1..MaxAttributes,1..2 ]
    OF INTEGER;

```

```

  Inval : ARRAY[1..MaxAlternatives,1..MaxAttributes] OF REAL;

```

```

  Row,Col,K,L,TempPoint : INTEGER;

```

```

  TempVec : CombVec;

```

```

BEGIN (* StochValues *)

```

```

  (Echo that stochvalues has been called)

```

```

  cursetvv(24,40);

```

```

  write(output,' ');

```

```

  cursetvv(24,40);

```

```

  write(output,'Calling Stochvalues');

```

```

  FOR Row := 2 TO NAlternatives DO

```

```

    FOR Col := 1 TO Row - 1 DO

```

```

      BEGIN

```

```

Pair[Row,Col,1] := 0;
Pair[Row,Col,2] := 0;
WHILE (Pair[Row,Col,1] = Pair[Row,Col,2]) DO
  BEGIN
    Temp[1]:=IntRand(1,NAttributes);
    Temp[2]:=IntRand(1,NAttributes);

    IF Temp[1] < Temp[2] THEN
      BEGIN
        Pair[Row,Col,1]:=Temp[1];
        Pair[Row,Col,2]:=Temp[2];
      END (* IF *)
    ELSE
      BEGIN
        Pair[Row,Col,2]:=Temp[1];
        Pair[Row,Col,1]:=Temp[2];
      END; (* ELSE *)
    END; (* WHILE *)
  END; { FOR }

(* Initialize the Values Array *)
FOR Row:= 1 TO NAlternatives DO
  BEGIN
    InitValues(TXTempRand);
    FOR Col := 1 TO NAttributes DO
      InVal[Row,Col]:=TXTempRand[Col];
    END; (* FOR *)

(* Sort it in ascending order so that attributes now are *)
(* exclusive ranges *)
FOR Col := 1 TO NAttributes DO
  FOR Row := 1 TO NAlternatives DO
    BEGIN
      TempPoint:= Row * NAttributes - (NAttributes - Col);
      TempVec[TempPoint]:=InVal[Row,Col];
    END; (* FOR *)

TempPoint:=NAttributes*NAlternatives;
Vsrta(TempVec,TempPoint);

FOR Col := 1 TO NAttributes DO
  FOR Row := 1 TO NAlternatives DO
    BEGIN
      TempPoint := (Col * NAlternatives) -
        (NAlternatives - Row);
      InVal[Row,Col]:=TempVec[TempPoint];
    END; (* FOR *)

(* Initialize temporary order to NAlternatives *)
FOR Col := 1 TO NAttributes DO
  FOR Row := 1 TO NAlternatives DO
    Order[Row,Col]:=NAlternatives;

FOR Row:= 2 TO NAlternatives DO
  FOR Col := 1 TO Row-1 DO
    BEGIN
      Order[Row,Pair[Row,Col,1]] :=
        Order[Row,Pair[Row,Col,1]] + 1;
      Order[Row,Pair[Row,Col,2]] :=
        Order[Row,Pair[Row,Col,2]] - 1;
    END;
  END;

```

```

        END;

FOR Col := 1 TO NAttributes DO
    BEGIN
        FOR Row := 1 TO NAlternatives DO
            BEGIN
                Index[Row]:=Row;
                TempRand[Row]:= Order[Row,Col];
            END; (* FOR *)

            Vsrtr(TempRand,NAlternatives,Index); (* Sort the values *)

            FOR Row := 1 TO NAlternatives DO (* Now place the sorted
                values in the output array *)
                Values[Index[Row],Col] := Inval [Row,Col];
            END; (* FOR *)

            (* Now Permute the attributes for each alternative. *)
            FOR Row := 1 TO NAlternatives DO
                BEGIN
                    FOR Col := 1 TO NAttributes DO
                        TempRand[Col] := Values[Row,Col];

                        Permuter(NAttributes,TempRand);

                        FOR Col := 1 TO NAttributes DO
                            Values[Row,Col] := TempRand[Col];
                        END; (* FOR *)
                    END; (* FOR *)
                END; (* StochValues *)
            END;

```

```

FUNCTION Dominance (InValue: VTable): BOOLEAN;

```

```

(* This function determines if there are any dominated alternatives in
the array InArray, using first order stochastic dominance. InArray is
dimensioned by the globals NAlternatives and NAttributes. The value
of dominance is 0 if there are no dominated alternatives, otherwise it
returns the ranking of the dominated alternative (lowest cumulative
payoff = 1). It also writes the ranks of the dominated and dominating
alternative to OUTPUT. *)

```

```

VAR Dominant,TDominant: BOOLEAN ;
    Row,Col,A1,A2,K,L :INTEGER; (* Index variables *)
    Tvalue,Pvalue : ARRAY [1..MaxAlternatives]OF AttVec;
    (* These hold the cumulative frequencies *)
    Rndtmp: Altmap; (* Order of the cumulative payoffs *)
    TempSort : AltVec;

BEGIN (* Dominance *)
    (* First Assign the value array to two variables containing the
    cumulative sums of the probabilities after sorting payoffs*)

    FOR Row := 1 TO NAlternatives DO
        BEGIN
            FOR Col := 1 TO NAttributes DO
                BEGIN
                    TempSort[Col]:=InValue[Row,Col];
                    Rndtmp[Col]:=Col;
                END;
            END;
        END;
    END;

```

```

        END; (* FOR *)

Vsrtr(Tempsort,NAttributes,Rndtmp);

FOR Col := 1 TO NAttributes DO
    BEGIN
        Tvalue[Row,Col]:=Tempsort[Col];
        IF Col = 1 THEN
            PValue[Row,Col]:= InValue[Row,Rndtmp[Col]+NAttri
        ELSE PValue[Row,Col]:= PValue[Row,Col-1] +
            InValue[Row,Rndtmp[Col]+NAttr
        END; (* FOR *)

        DomValues[Row]:=0.0;
    END; (* FOR *)

(* This section creates an index in Rndtmp which orders the
alternatives by cumulative payoffs.*)
FOR Row := 1 TO NAlternatives DO
    BEGIN
        Tempsort[Row] := Tvalue[Row,NAttributes];
        Rndtmp[Row] := Row;
    END; (* FOR *)

Vsrtr (Tempsort,NAlternatives,Rndtmp);

(* Now we conduct the test. *)
A1:=NAlternatives;

REPEAT
    A2 := A1 - 1 ;
    REPEAT
        K:=NAttributes;
        Dominant := TRUE;
        WHILE Dominant AND (K >= 1) AND (A1 <> A2) DO
            BEGIN
                L:=NAttributes;
                WHILE Dominant AND (L >= 2) DO
                    IF (Tvalue[Rndtmp[A1],K] < Tvalue[Rndtmp[A2],L])
                    (Pvalue[Rndtmp[A1],K] > Pvalue[Rndtmp[A2],L-1]
                    Dominant := FALSE
                ELSE L := L - 1;
                K:= K - 1;
            END; (* WHILE *)

            (* Last check for the final point. *)
            IF (Tvalue[Rndtmp[A1],1] < Tvalue[Rndtmp[A2],1]) THEN
                Dominant:=FALSE;

            IF (Dominant) THEN
                BEGIN
                    DomValues[Rndtmp[A2]]:=1.0;
                    TDominant:=TRUE;
                    Dominant:=FALSE;
                END;

                IF NOT Dominant THEN A2:= A2 - 1;
            UNTIL (Dominant OR (A2 = 0 ));

            IF NOT Dominant THEN A1:= A1 - 1;

```

```

UNTIL (Dominant OR (A1 = 1 ));

IF Dominant THEN
  BEGIN
    writeln('Dominant Alternative: ',
           A2 , ' dominates ', A1 , ', Trail: ',I);
    Dominance := True;
  END
ELSE Dominance:= TDominant;

END; (* Dominance *)

```

```

{$list+}
(*****
(* INITIALIZE *)
(*****

```

```

BEGIN (* Initialize *)

```

```

(* * * * *
(* Three PayOffGenerator values control the generation of pay- *)
(* offs in the values matrix: *)
(* PG = 1 = No Dominance. Dominance screened out of the set. *)
(* StochValues/Dominance procs in START. *)
(* PG = 2 = Dominance. Dominance occurs randomly in the set. *)
(* InitValues proc in START. *)
(* PG = 3 = Correlated Attributes. Can be declared equal with *)
(* the desired correlation supplied, or unequal. *)
(* If unequal, values are read in from an external *)
(* file called SigFile, named when pgm invoked. *)
(* MakeSig/Ggnms procs in RANDOM. *)
(* *)
(* Three Tran values control the generation of probabilities *)
(* (or weights) in the values matrix via the InitProbabilities *)
(* proc in START: *)
(* Tran = 1 = Thorngate. (GenProbs in RANDOM). *)
(* Tran = 2 = Uniform Hyperplane. (Hostile in RANDOM). *)
(* Tran = 3 = Dirichlet. (Dirichlet in RANDOM). *)
(* * * * *

```

```

(* * * No Dominance * * *)

```

```

IF PG = 1 THEN (* PayOffGenerator - No Dominance *)
  BEGIN
    REPEAT
      StochValues;
      FOR AltNum:= 1 TO NAlternatives DO
        IF ((Risky) OR (AltNum = 1))
          THEN InitProbabilities(Values[AltNum])
          ELSE FOR AttNum := 1 to NAttributes DO
            Values[AltNum][NAttributes+AttNum] :=
              Values[1][NAttributes+AttNum];
          UNTIL ((NOT Dominance(Values)) OR (NOT RISKY)); (* REPEAT *)
      END; (* If PG = 1 *)

```

```

(* * * Dominance Occurs Randomly * * *)

```

```
IF PG = 2 THEN
```

```
(* Modification: when input value of NumDomAltern > 0, *)  
(* selects only those gambles generated w/NumDomAltern *)  
(* number of dominated alternatives per set. *)  
(* ** Restriction: the set must be 4 alt x 3 att. *)
```

```
IF NumDomAltern > 0 THEN      (* Specific # dominated alterns *)  
BEGIN
```

```
    IF NAlternatives <> 4 THEN      (* error trapping *)  
    BEGIN  
        cursetvv(12,0);  
        write (output, '***      Required for this run:      ***');  
        cursetvv(13,0);  
        write (output, '*** NAlternatives = 4  NAttributes = 3 ***');  
        cursetvv(14,0);  
        write (output, '*** Halt execution & reset parameters. ***');  
        END;  
    IF NAttributes <> 3 THEN      (* error trapping *)  
    BEGIN  
        cursetvv(12,0);  
        write (output, '*** Halt execution & reset paramters: ***');  
        cursetvv(13,0);  
        write (output, '*** NAlternatives = 4  NAttributes = 3 ***');  
        END;
```

```
SetHasDominance := FALSE;
```

```
REPEAT
```

```
FOR AltNum:= 1 to NAlternatives do
```

```
    BEGIN
```

```
        InitValues(Values[AltNum]);
```

```
        IF ((Risky) OR (AltNum = 1))
```

```
            THEN InitProbabilities(Values[AltNum])
```

```
        ELSE
```

```
            FOR AttNum := 1 to NAttributes DO
```

```
                Values[AltNum][NAttributes+AttNum] :=
```

```
                Values[1][NAttributes+AttNum];
```

```
    END; (* FOR AltNum... *)
```

```
    SetUpDominance;      (* Checks # dom alterns in gamble set. *)
```

```
    UNTIL SetHasDominance; (* Repeat until specified # found. *)
```

```
END      (**** IF NumDomAltern > 0 ****)
```

```
ELSE (* For Dominance allowed, but NumDomAltern disabled with *)
```

```
    (* a zero value. Dominance is random. *)
```

```
BEGIN
```

```
    For AltNum := 1 to NAlternatives do
```

```
        BEGIN
```

```
            InitValues(Values[AltNum]);
```

```
            IF ((Risky) OR (AltNum = 1))
```

```
                THEN InitProbabilities(Values[AltNum])
```

```
            ELSE
```

```
                FOR AttNum := 1 to NAttributes DO
```

```
                    Values[AltNum][NAttributes+AttNum] :=
```

```
                    Values[1][NAttributes+AttNum];
```

```
        END; (* FOR AltNum... *)
```

```

    (* Check for a dominated alternative. *)
    IF Dominance(Values) THEN
        DomExist:= 1
    ELSE DomExist:=0;
END;    (* End IF PG = 2 *)

(* * * Correlated Attributes * * *)

IF PG = 3 THEN
BEGIN
    MakeSig;    (* Proc in RANDOM which fills Sigma Array. *)
    Ggnms(SigmaX,NAalternatives,NAttributes,Sigma);
    (* Fills SigmaX array with attributes. *)
    For AltNum := 1 to NAalternatives DO
    BEGIN
        FOR AttNum := 1 to NAttributes DO
            Values[AltNum,AttNum] := (SigmaX[AltNum,AttNum]*1000.00);
        IF ((RISKY) OR (AltNum = 1))
            THEN InitProbabilities(Values[AltNum])
        ELSE
            For AttNum := 1 to NAttributes DO
                Values[AltNum][NAttributes + AttNum] :=
                    Values[1][NAttributes + AttNum];
            END;    (* For AltNum *)
        END;    (* IF PG = 3 *)
    END;

    (* Common to all three PayOffGenerators: *)

    FOR AltNum := 1 to NAalternatives DO
    BEGIN
        ChoiceValues[AltNum]:= CalcValue(Values[AltNum]);
        ChoiceUtils[AltNum]:= CalcUtils(Values[AltNum]);

        (* Do one pass of a sort here. *)
        PutInSortedPosition(InvMap,ChoiceValues,AltNum);
        PutInSortedPosition(InvUMap,ChoiceUtils,AltNum);
    END;    (* FOR *)

    (* Convert InvMap from array over rankings to array of rankings. *)
    FOR AltNum:= 1 TO NAalternatives DO
    BEGIN
        ChoiceRanking[InvMap[AltNum]]:=NAalternatives - AltNum + 1;
        ChoiceURank[InvUMap[AltNum]]:=NAalternatives - AltNum + 1;
    END;

    (* CUTOFFS: *)
    (* 4/22/85 - Use user-specified cutoff or if user allows *)
    (* default (zero), use mean of distribution as cutoff. *)

    IF CutOffValue = 0 THEN    (* Default to mean of dist. *)
    BEGIN

```

```

FOR AttNum := 1 TO NAttributes DO
  CutOffs[AttNum]:=Dist / 2;
  CutOffValue:=Dist / 2;
END;
IF CutOffValue > 0 THEN      (* User-specified cutoff. *)
  FOR AttNum := 1 to NAttributes DO
    CutOffs[AttNum]:=CutOffValue;

  (* Cut offs for prob. are mean of that dist. *)
  FOR AttNum:= NAttributes + 1 TO 2 * NAttributes DO
    CutOffs[AttNum]:= 1 / NAttributes;

```

```

(* * * * * * * * * * * * * * * * * * * * * * * * * * * * * * * * * * * * * * * * * * * * * * * * * * * * * *)
(*      Write out the gambles presented to the rules:                                     *)
(* * * * * * * * * * * * * * * * * * * * * * * * * * * * * * * * * * * * * * * * * * * * * * * * * * * * * *)

```

```

IF (FmtPrt=TRUE) THEN      (* Formatted Gamble Output *)
BEGIN
  Writeln(Gamble, ' ');
  FOR AltNum:= 1 TO NAlternatives DO
  BEGIN
    WRITE(Gamble,AltNum:2);
    FOR AttNum:=1 to NAttributes DO
    BEGIN
      WRITE(Gamble,AttNum:2,Values[AltNum,AttNum]:8:2,
        Values[AltNum,NAttributes+AttNum]:6:3);
    END; (* For AttNum *)
    WRITELN(Gamble, ' ');
  END; (* FOR AltNum *)
  Writeln (Gamble, ' ');
END (* If FmtPrt *)

```

```

ELSE BEGIN      (* Condensed Gamble Output *)
  FOR AltNum := 1 TO NAlternatives DO
  BEGIN
    WRITE(Gamble,NAlternatives:2,NAttributes:2,Tran:3,AltNum:2);
    FOR AttNum:=1 to NAttributes DO
    BEGIN
      WRITE(Gamble,AttNum:2,Values[AltNum,AttNum]:8:2,
        Values[AltNum,NAttributes+AttNum]:6:3);
    END; (* For AttNum *)
    WRITELN(Gamble, ' ');
  END; (* For AltNum *)
END; (* ELSE *)

```

```

END; (* Initialize *)

```

```

{$list-}
END. {Unit}

```

```

(*****
(* VERSION 1                      TIMED RISKLESS SIM      *)
(* STMPRIMS.INT                   08/20/85                *)
(*****

```

```
INTERFACE;
```

```
UNIT STMPRIMS(TraceSTM,Timer,Remember,GetCut,GetJND,Forget,IsEmpty,
  Mult,Divi,Add,Add1,Subt,Subt1,GetMax,MaxProb,GetMin,GetWeight);
USES Sim;
```

```

(* * * * * * * * * * * * * * * * * * * * * * * * * * * * * * * * * * *)
(* Primitive routines to access the short term memory.                *)
(* * * * * * * * * * * * * * * * * * * * * * * * * * * * * * * * * * *)

```

```
PROCEDURE TraceSTM(CONST Op:string; l1,l2,l3:MemLoc);
```

```
PROCEDURE Timer(TimeVal:REAL);
```

```
PROCEDURE Remember(L: MemLoc);
```

```
(* Brings current alternative and attribute into short term memory. *)
```

```
PROCEDURE GetCut(M1,Result: MemLoc);
```

```
(* Brings current alternative and attribute into short term memory. *)
```

```
PROCEDURE GetJND(Result: MemLoc);
```

```
(* Brings Just Noticeable Difference value into short term memory. *)
```

```
(* Used by riskless LexiSemi rule. *)
```

```
PROCEDURE Forget(L: MemLoc);
```

```
(* Throw away info in location L and say this spot is open. *)
```

```
FUNCTION IsEmpty(L: MemLoc): BOOLEAN;
```

```
(* True iff L is a free memory spot. *)
```

```
PROCEDURE Mult(M1,M2,Result: MemLoc);
```

```
(* Remembers the result of multiplying the Values of M1 and M2 in Result *)
```

```
(* The alternative of the result is the greater of the two input alts. *)
```

```
PROCEDURE Divi( M1,M2,Result: MemLoc);
```

```
(* Remembers the result of dividing the Value's of M1 and M2 in Result *)
```

```
(* Division by zero is trapped and the return is equal to zero *)
```

```
(* The alternative of the result is the greater of the input alts. *)
```

```
PROCEDURE Add(M1,M2,Result: MemLoc);
```

```
(* Remembers the result of adding the Values of M1 and M2 in Result *)
```

```
(* The alternative of the result is the greater of the two input alts. *)
```

```
PROCEDURE Add1(Result: MemLoc);
```

```
(* Adds 1 to the value in Result. *)
```

```
(* Used to increment, can be changed to use a constant if necessary. *)
```

```
PROCEDURE Subt(M1,M2,Result: MemLoc);
```

```
(* Remembers the result of subtracting the Values of M2 from M1 in Result *)
```

```
(* The alternative of the result is the greater of the two input alts. *)
```

```
PROCEDURE Subt1(Result: MemLoc);
(* Subtracts 1 from the value in Result. *)
(* Used to decrement; can be changed to use a constant if necessary. *)

PROCEDURE GetMax(M1,M2,Result: MemLoc);
(* Remembers the maximum of the values of M1 and M2 in Result *)
(* The alternative of the result is the greater of the two input alts. *)

PROCEDURE MaxProb(M1,M2,Result1,Result2: MemLoc);
(* Evaluates most likely payoff for a given alternative under
  consideration in DoMostLikely. *)

PROCEDURE GetMin(M1,M2,Result: MemLoc);
(* Remembers the minimum of the values of M1 and M2 in Result. *)
(* The alternative of the result is the LESSER of the input alts. *)

PROCEDURE GetWeight(M1: MemLoc);
(* Brings current attribute weight into short term memory. *)
(* Used by riskless AddUtility and EBA. *)

END;
```

```

(*****
(* VERSION 1                                TIMED RISKLESS SIM *)
(* STMPRIMS.PAS                             11/12/85          *)
(* Reads weights for operators from OpWtArr array, which contains *)
(* values input from an external file supplied by the user.    *)
(*****

```

```

{$include:'screenvv.int'}
{$include:'fformsuu.int'}
{$INCLUDE:'sim.int'}
{$INCLUDE:'stmprims.int'}
{$include:'numprims.int'}
{$include:'lstprims.int'}

```

```

IMPLEMENTATION OF STMPRIMS;
USES sim,lstprims,numprims,fformsuu,screenvv;

```

```

(* * * * *
(* Primitive routines to access the short term memory. *)
(* * * * *

```

```

Procedure TraceSTM;
{(CONST Op:string; l1,l2,l3:MemLoc)}

```

```

CONST
    xop = 1;
    yop = 12;
    xmem=30;
    ymem=12;
    xatt=1;
    yatt=15;

```

```

VAR
    I : Byte;
    ch: char;

```

```

BEGIN
If Debug > 0 then
    BEGIN
    Cursetvv(yop,xop);
    Write(output,' ');
    Cursetvv(yop,xop);
    Write(output,'Operator: ',op);
    IF(l1 <> 0) THEN WRITE(l1:2);
    IF(l2 <> 0) THEN WRITE(l2:2);
    IF(l3 <> 0) THEN WRITE(l3:3:2);

    cursetvv(yatt,xatt);
    write(output,'Alternative: ',CurrValue(Altern):3);
    cursetvv(yatt+1,xatt);
    write(output,'Attribute: ',CurrValue(Attrib):3);
END; {IF}
If Debug > 1 then
    BEGIN
    cursetvv(ymem,xmem);
    Write('Memory Contents:');
    FOR I := 1 to NMemCell DO
        WITH STM[I] DO

```

```

        BEGIN
        cursetvv(ymem+I,xmem);
        write(I:3,optype:3,Att:3,Alt:3,AValue:8:2);
        END; {with}
    cursetvv(23,24);
    write('Press return to continue');
    read(ch);
END; {if}

END; {TraceSTM}

```

```

PROCEDURE Timer;
(* TimeVal:REAL; *)
(* Specific to Timed Sim. This procedure is called by each operator, *)
(* such as Remember, Elim, etc. The operator's TimeVal weight is *)
(* passed and used to increment the total "time" used for the rule *)
(* being run. A condition statement in the rule then sets TimeUp *)
(* to TRUE if the TimeLimit has been reached, and normal processing *)
(* in the rule stops. *)

```

```

VAR TimeUp: BOOLEAN;

```

```

BEGIN (* Timer *)
    TimeUp := FALSE;
    Time[Rule] := Time[Rule] + TimeVal;
    IF Time[Rule] >= TimeLimit THEN
        TimeUp := TRUE;

```

```

END; (* Timer *)

```

```

PROCEDURE Remember;
(* Brings current alternative and attribute into short term memory. *)

```

```

VAR TimeVal: REAL;

```

```

    BEGIN (* Remember *)
        WITH STM[L] DO BEGIN
            OpType:= Momento;
            Alt:= CurrValue(Altern);
            Att:= CurrValue(Attrib);
            AValue:= Values[Alt][Att];

```

```

        END; (* WITH *)

```

```

        TraceSTM('Remember',L,0,0);
        OperationCount[Momento]:= OperationCount[Momento] + 1;

```

```

        (* For Timed Sim, call proc to increment counter: *)
        TimeVal := OpWtArr[Momento];
        Timer(TimeVal);

```

```

    END; (* Remember *)

```

```

PROCEDURE GetCut;
(* Brings current alternative and attribute into short term memory. *)

VAR TimeVal: REAL;

BEGIN (* GetCut *)
  WITH STM[Result] DO BEGIN
    Att:= STM[M1].Att;
    IF Att = 0 THEN Att:=1;
    Alt:= CutOffVal;
    AValue:= CutOffs[Att];
    OpType:= Blood;
  END; (* WITH *)

  TraceSTM('GetCut',M1,Result,0);
  OperationCount[Blood]:= OperationCount[Blood] + 1;

  (* For Timed Sim, call proc to increment counter: *)
  TimeVal := OpWtArr[Blood];
  Timer(TimeVal);

END; (* GetCut *)

PROCEDURE GetJND;
(* Brings Just Noticeable Difference value into STM. *)
(* Result:MemLoc *)

VAR TimeVal: REAL;

BEGIN (* GetJND *)
  WITH STM[Result] DO
  BEGIN
    AValue := JND;
    OpType := Squint;
  END; (* With *)

  TraceSTM('GetJND',Result,0,0);
  OperationCount[Squint]:=OperationCount[Squint]+1;

  (* For Timed Sim, call proc to increment counter: *)
  TimeVal := OpWtArr[Squint];
  Timer(TimeVal);

END; (* GetJnd *)

PROCEDURE Forget;
(* Throw away info in location L and say this spot is open. *)

VAR TimeVal: REAL;

BEGIN (* Forget *)
  WITH STM[L] DO BEGIN
    OpType:= Empty;
    Alt:= 0;
    Att:= 0;
    AValue:= 0.0;
  END; (* WITH *)

```

```
TraceSTM('Forget',L,0,0);
OperationCount[Oversight]:= OperationCount[Oversight] + 1;
```

```
(* For Timed Sim, call proc to increment counter: *)
TimeVal := OpWtArr[OverSight];
Timer(TimeVal);
```

```
END; (* Forget *)
```

```
FUNCTION IsEmpty;
(* True iff L is a free memory spot. *)
```

```
VAR TimeVal: REAL;
```

```
BEGIN (* IsEmpty *)
  WITH STM[L] DO
    IsEmpty:= OpType = Empty;
```

```
TraceSTM('IsEmpty',L,0,0);
OperationCount[Empty] := OperationCount[Empty] + 1;
```

```
(* For Timed Sim, call proc to increment counter: *)
TimeVal := OpWtArr[Empty];
Timer(TimeVal);
```

```
END; (* IsEmpty *)
```

```
PROCEDURE Mult;
```

```
(* Remembers the result of multiplying the Values of M1 and M2 in Result *)
(* The alternative of the result is the greater of the two input alts. *)
```

```
VAR TimeVal: REAL;
```

```
BEGIN (* Mult *)
  WITH STM[Result] DO BEGIN
    AValue:= STM[M1].AValue * STM[M2].AValue;
```

```
OpType:= Product;
```

```
Alt:= STM[M1].Alt;
```

```
Att:= STM[M1].Att;
```

```
END; (* WITH *)
```

```
TraceSTM('Mult',M1,M2,Result);
OperationCount[Product]:= OperationCount[Product] + 1;
```

```
(* For Timed Sim, call proc to increment counter: *)
TimeVal := OpWtArr[Product];
Timer(TimeVal);
```

```
END; (* Mult *)
```

```
PROCEDURE Divi;
```

```
(* Remembers the result of dividing the Value's of M1 and M2 in Result *)
(* Division by zero is trapped and the return is equal to zero *)
(* The alternative of the result is the greater of the input alts. *)
```

```
VAR TimeVal: REAL;
```

```
BEGIN (* Div *)  
  WITH STM[Result] DO BEGIN  
    IF (STM[M2].AValue = 0) THEN STM[Result].AValue := 0  
    ELSE AValue:=STM[M1].AValue / STM[M2].AValue;  
  
    OpType:= Quotient;  
  
    Alt:= STM[M1].Alt;  
    Att:= STM[M2].Att;  
  END; (* WITH *)  
  
  TraceSTM('Divi',M1,M2,Result);  
  OperationCount[Quotient]:= OperationCount[Quotient] + 1;  
  
  (* For Timed Sim, call proc to increment counter: *)  
  TimeVal := OpWtArr[Quotient];  
  Timer(TimeVal);  
  
END; (* Divi *)
```

```
PROCEDURE Add;
```

```
(* Remembers the result of adding the Values of M1 and M2 in Result *)  
(* The alternative of the result is the greater of the two input alts. *)
```

```
VAR TimeVal: REAL;
```

```
BEGIN (* Add *)  
  WITH STM[Result] DO BEGIN  
    AValue:= STM[M1].AValue + STM[M2].AValue;  
  
    OpType:= Sum;  
  
    Alt:= STM[M1].Alt;  
    Att:= STM[M1].Att;  
  END; (* WITH *)  
  
  TraceSTM('Add',M1,M2,Result);  
  OperationCount[Sum]:= OperationCount[Sum] + 1;  
  
  (* For Timed Sim, call proc to increment counter: *)  
  TimeVal := OpWtArr[Sum];  
  Timer(TimeVal);  
  
END; (* Add *)
```

```
PROCEDURE Add1;
```

```
(* Adds 1 to the value in Result *)  
(* Used to increment, can be changed to use a constant if necessary. *)
```

```
VAR TimeVal: REAL;
```

```
BEGIN (* Add *)  
  WITH STM[Result] DO BEGIN  
    AValue:= STM[Result].AValue + 1.0;
```

```

    OpType:= Sum;

    Alt:= STM[Result].Alt;
    Att:= STM[Result].Att;
END; (* WITH *)

TraceSTM('Add1',Result,0,0);
OperationCount[Sum]:= OperationCount[Sum] + 1;

(* For Timed Sim, call proc to increment counter: *)
TimeVal := OpWtArr[Sum];
Timer(TimeVal);

END; (* Add1 *)

```

```

PROCEDURE Subt;
(* Remembers the result of subtracting the Values of M2 from M1 in Result *)
(* The alternative of the result is the greater of the two input alts. *)

```

```

VAR TimeVal: REAL;

```

```

BEGIN (* Subt *)
    WITH STM[Result] DO BEGIN
        AValue:= STM[M1].AValue - STM[M2].AValue;

        OpType:= Difference;

        Alt:= STM[M1].Alt;
        Att:= STM[M1].Att;
    END; (* WITH *)

    TraceSTM('Subt',M1,M2,Result);
    OperationCount[Difference]:= OperationCount[Difference] + 1;

    (* For Timed Sim, call proc to increment counter: *)
    TimeVal := OpWtArr[Difference];
    Timer(TimeVal);

END; (* Subt *)

```

```

PROCEDURE Subt1;
(* Subtracts 1 from the value in Result. *)
(* Used to decrement, can be changed to use a constant if necessary. *)

```

```

VAR TimeVal: REAL;

```

```

BEGIN (* Add *)
    WITH STM[Result] DO BEGIN
        AValue:= STM[Result].AValue - 1.0;

        OpType:= Difference;

        Alt:= STM[Result].Alt;
        Att:= STM[Result].Att;
    END; (* WITH *)

    TraceSTM('Subt1',Result,0,0);
    OperationCount[Difference]:= OperationCount[Difference] + 1;

```

```
(* For Timed Sim, call proc to increment counter: *)
TimeVal := OpWtArr[Difference];
Timer(TimeVal);
```

```
END; (* Subt1 *)
```

```
PROCEDURE GetMax;
```

```
(* Remembers the maximum of the values of M1 and M2 in Result *)
(* The alternative of the result is the greater of the two input alts. *)
```

```
VAR TimeVal: REAL;
```

```
BEGIN (* GetMax *)
```

```
WITH STM[Result] DO BEGIN
```

```
IF STM[M1].AValue > STM[M2].AValue THEN BEGIN
```

```
  AValue:= STM[M1].AValue;
```

```
  Alt:= STM[M1].Alt;
```

```
  Att:= STM[M1].Att;
```

```
END ELSE BEGIN
```

```
  AValue:= STM[M2].AValue;
```

```
  Alt:= STM[M2].Alt;
```

```
  Att:= STM[M2].Att;
```

```
END;
```

```
OpType:= Maximum;
```

```
END; (* WITH *)
```

```
TraceSTM('GetMax',M1,M2,Result);
```

```
OperationCount[Maximum]:= OperationCount[Maximum] + 1;
```

```
(* For Timed Sim, call proc to increment counter: *)
```

```
TimeVal := OpWtArr[Maximum];
```

```
Timer(TimeVal);
```

```
END; (* GetMax *)
```

```
PROCEDURE MaxProb;
```

```
(* Evaluates most likely payoff for a given alternative under
consideration in DoMostLikely. *)
```

```
VAR TimeVal: REAL;
```

```
BEGIN (* MaxProb *)
```

```
WITH STM[Result1] DO BEGIN
```

```
IF STM[M1].AValue>STM[M2].AValue THEN BEGIN
```

```
  AValue:= STM[M1].AValue;
```

```
  Att:= STM[M1].Att;
```

```
  Alt:= STM[M1].Alt;
```

```
  OpType:= STM[M1].OpType;
```

```
END;
```

```
END;
```

```
WITH STM[Result2] DO BEGIN
```

```
IF STM[M1].AValue>STM[M2].AValue THEN BEGIN
```

```
  AValue:= STM[3].AValue;
```

```
  Att:= STM[3].Att;
```

```
  Alt:= STM[3].Alt;
```

```

        OpType:= STM[3].OpType;
    END;
END; (* WITH *)

(* For Timed Sim, call proc to increment counter: *)
TimeVal := 1.0;
Timer(TimeVal);

END; (* MaxProb *)

```

```

PROCEDURE GetMin;
(* Remembers the minimum of the values of M1 and M2 in Result *)
(* The alternative of the result is the LESSER of the input alts. *)

```

```

VAR TimeVal: REAL;

```

```

BEGIN (* GetMin *)
    WITH STM[Result] DO BEGIN
        IF STM[M2].AValue = 0 THEN BEGIN
            (* always puts empty cells as the lesser *)
            AValue:= STM[M1].AValue;
            Att:= STM[M1].Att;
            Alt:= STM[M1].Alt;
        END ELSE IF STM[M1].AValue < STM[M2].AValue THEN BEGIN
            AValue:= STM[M1].AValue;
            Att:= STM[M1].Att;
            Alt:= STM[M1].Alt;
        END ELSE BEGIN
            AValue:= STM[M2].AValue;
            Alt:= STM[M2].Alt;
            Att:= STM[M2].Att;
        END;

        OpType:= Minimum;
    END; (* WITH *)

    TraceSTM('GetMin',M1,M2,Result);
    OperationCount[Minimum]:= OperationCount[Minimum] + 1;

    (* For Timed Sim, call proc to increment counter: *)
    TimeVal := OpWtArr[Minimum];
    Timer(TimeVal);

END; (* GetMin *)

```

```

PROCEDURE GetWeight;
{M1 :MemLoc}
(* Brings current attribute weight into STM into short term memory. *)

```

```

VAR TimeVal: REAL;

```

```

BEGIN (* GetWeight *)
    WITH STM[M1] DO BEGIN
        Att:= CurrValue(Attrib);
        Alt:= CurrValue(Altern);
        AValue:= Values[1][NAttributes+Att];
        OpType:= Momento;
    END; (* WITH *)

```

```
TraceSTM('GetWeight',M1,0,0);
IF Risky THEN Write(Output,'Should not be used in Risky Choice');
OperationCount[Momento]:= OperationCount[Momento] + 1;
OperationCount[TheNext]:= OperationCount[TheNext] + 1;
```

```
(* For Timed Sim, call proc to increment counter: *)
TimeVal := OpWtArr[Momento];
Timer(TimeVal);
```

```
END; (* GetWeight *)
```

```
END.
($list+)
```
